# Supplementary material for: Total synthesis of (5R,6R,8R,9S)-(−)-5,9Z-indolizidine 221T using sulfinimine-derived N-sulfinyl β-amino ketones
Source: Royal Society of Chemistry journal article supplement (doi:10.1039/b915796d), 2009-01-01
Supplement: b915796d.pdf [file b915796d.pdf]

## **Total Synthesis of (5*R*,6*R*,8*R*,9*S*)-(-)-5, 9*Z*-Indolizidine 221T using**

### **Sulfinimine-Derived *N*-Sulfinyl $\beta$ -Amino Ketones**

Franklin A. Davis\*, Minsoo Song, Hui Qiu, and Jing Chai

Department of Chemistry, Temple University, Philadelphia, PA 19122

fdavis@temple.edu

#### **Supporting Information Available**

Contents:

NMR spectra for:

| <b>Compound</b> | <b>Page</b> | <b><sup>1</sup>H</b> | <b><sup>13</sup>C</b> |
|-----------------|-------------|----------------------|-----------------------|
| (-)-4           | S2          | S3                   |                       |
| (-)-7           | S4          | S5                   |                       |
| (-)-8           | S6          | S7                   |                       |
| (+)-9           | S8          | S9                   |                       |
| (-)-11          | S10         | S11                  |                       |
| (+)-13          | S12         | S13                  |                       |
| (-)-14          | S14         | S15                  |                       |
| (-)-16          | S16         | S17                  |                       |
| (-)-18          | S18         | S19                  |                       |
| (-)-19          | S20         | S21                  |                       |
| (-)-1           | S22         | S23                  |                       |

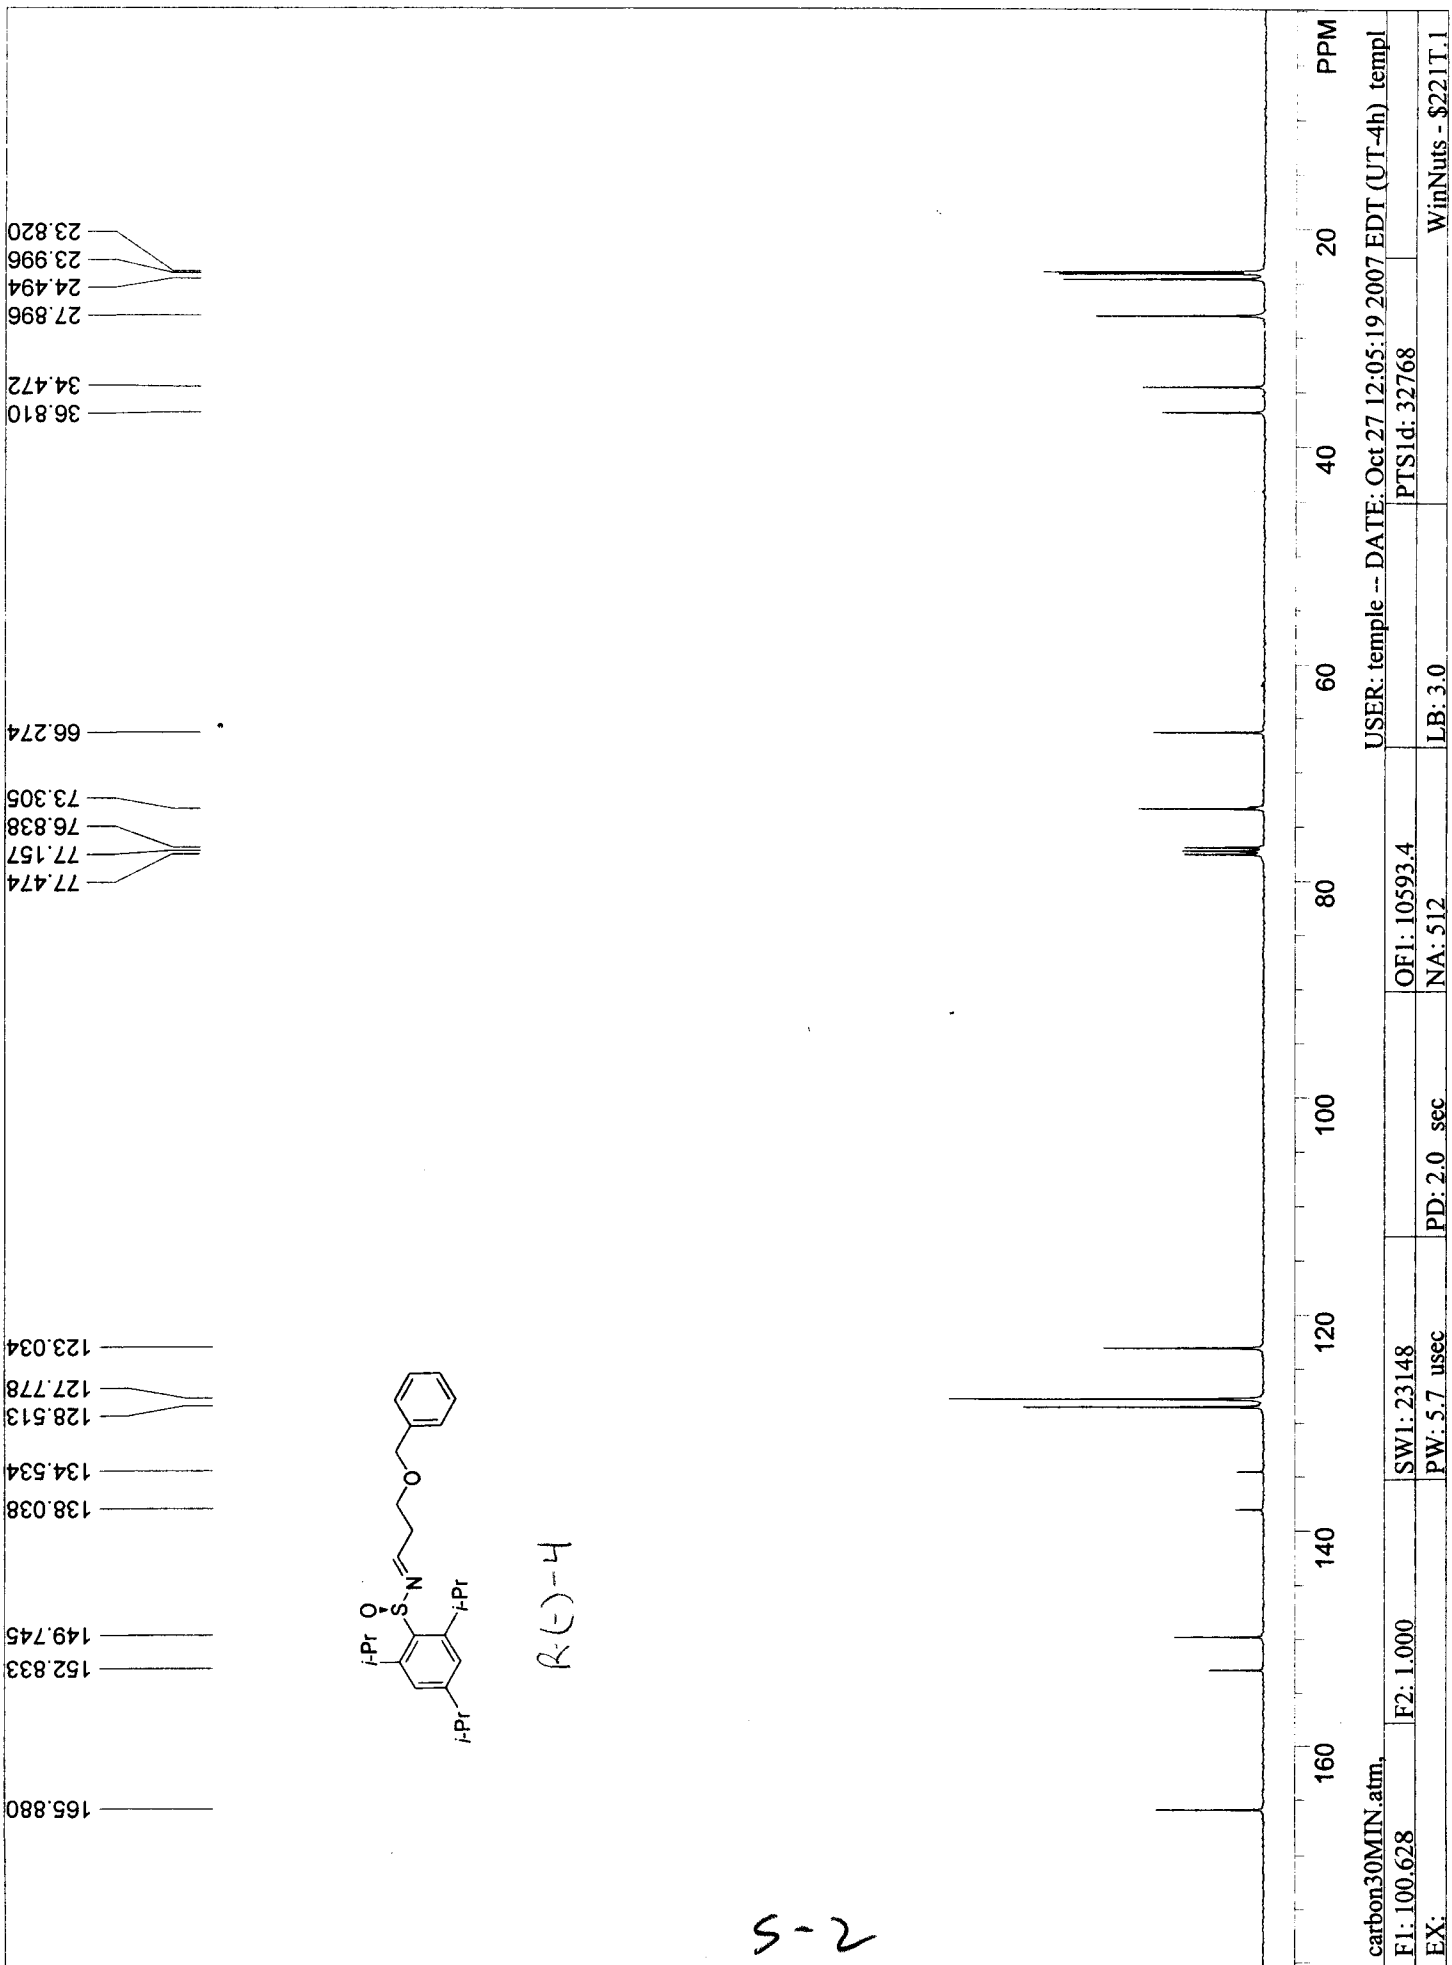

carbon30MIN.atm. USER: temple -- DATE: Oct 27 12:05:19 2007 EDT (UT-4h) templ

|             |           |              |              |                    |
|-------------|-----------|--------------|--------------|--------------------|
| F1: 100.628 | F2: 1.000 | SW1: 23148   | OF1: 10593.4 | PTSId: 32768       |
| EX:         |           | PW: 5.7 usec | NA: 512      | LB: 3.0            |
|             |           | PD: 2.0 sec  |              | WinNuts - \$221T.1 |

S-2

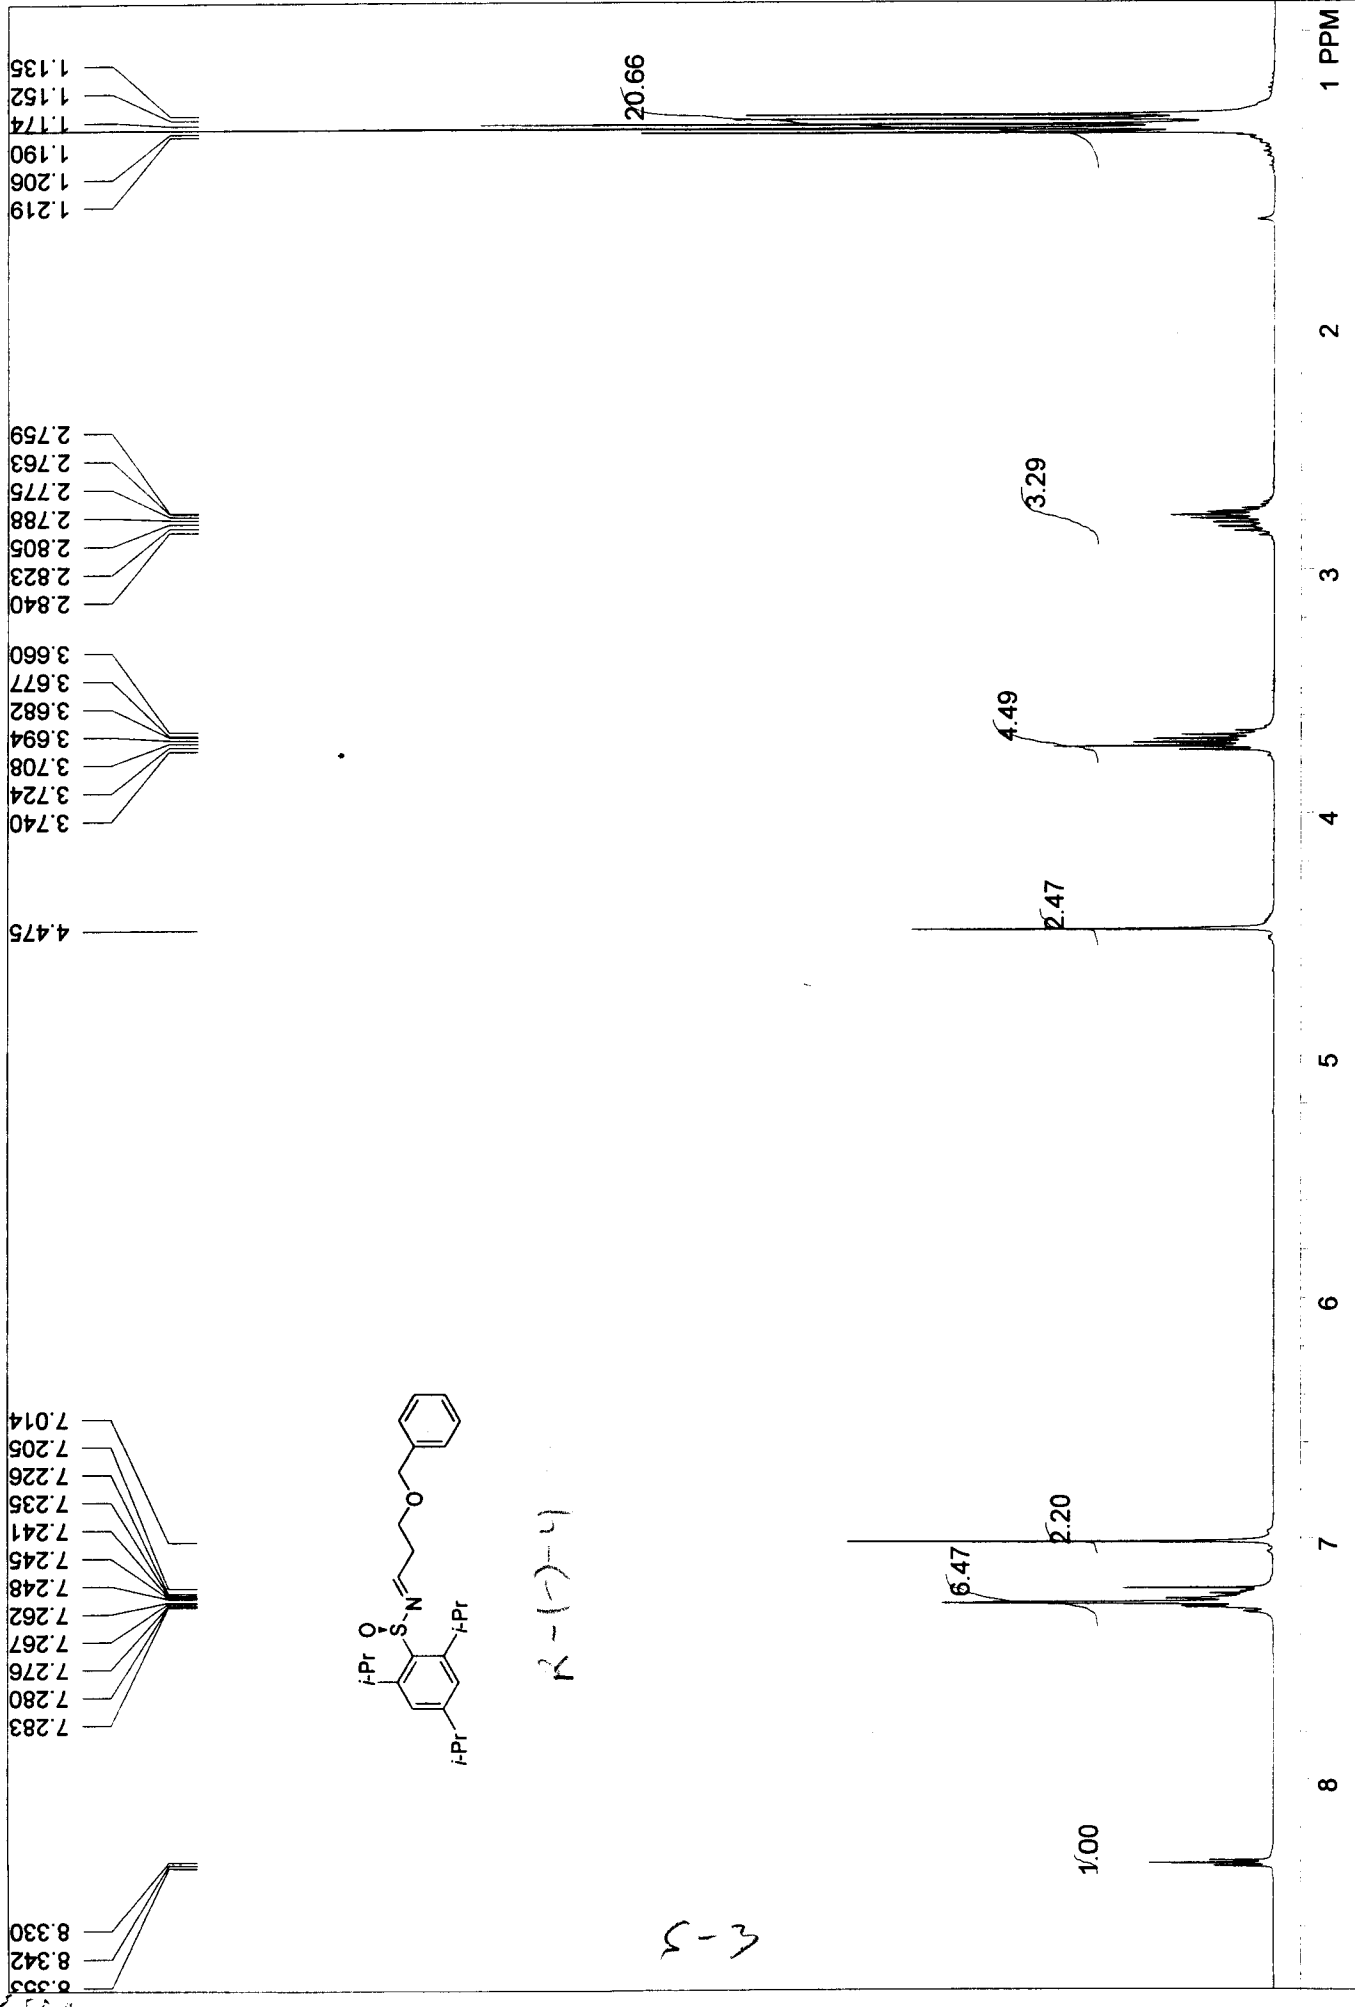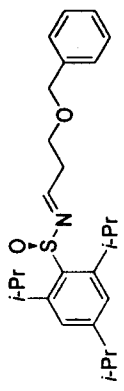

R-(+)-4

S-3

|                        |                                                              |              |                      |
|------------------------|--------------------------------------------------------------|--------------|----------------------|
| MS-II-129A, proton.atm | USER: temple -- DATE: May 18 16:49:06 2006 EDT (UT-4h) temp! | PTSId: 32768 | WinNuts - \$Minsoo.I |
| F1: 400.191            | OF1: 1980.1                                                  | LB: 0.1      |                      |
| F2: 1.000              | NA: 16                                                       |              |                      |
| EX:                    | PD: 1.0 sec                                                  |              |                      |
|                        | SW1: 8278                                                    |              |                      |
|                        | PW: 9.8 usec                                                 |              |                      |

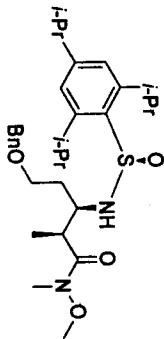

(-)-7

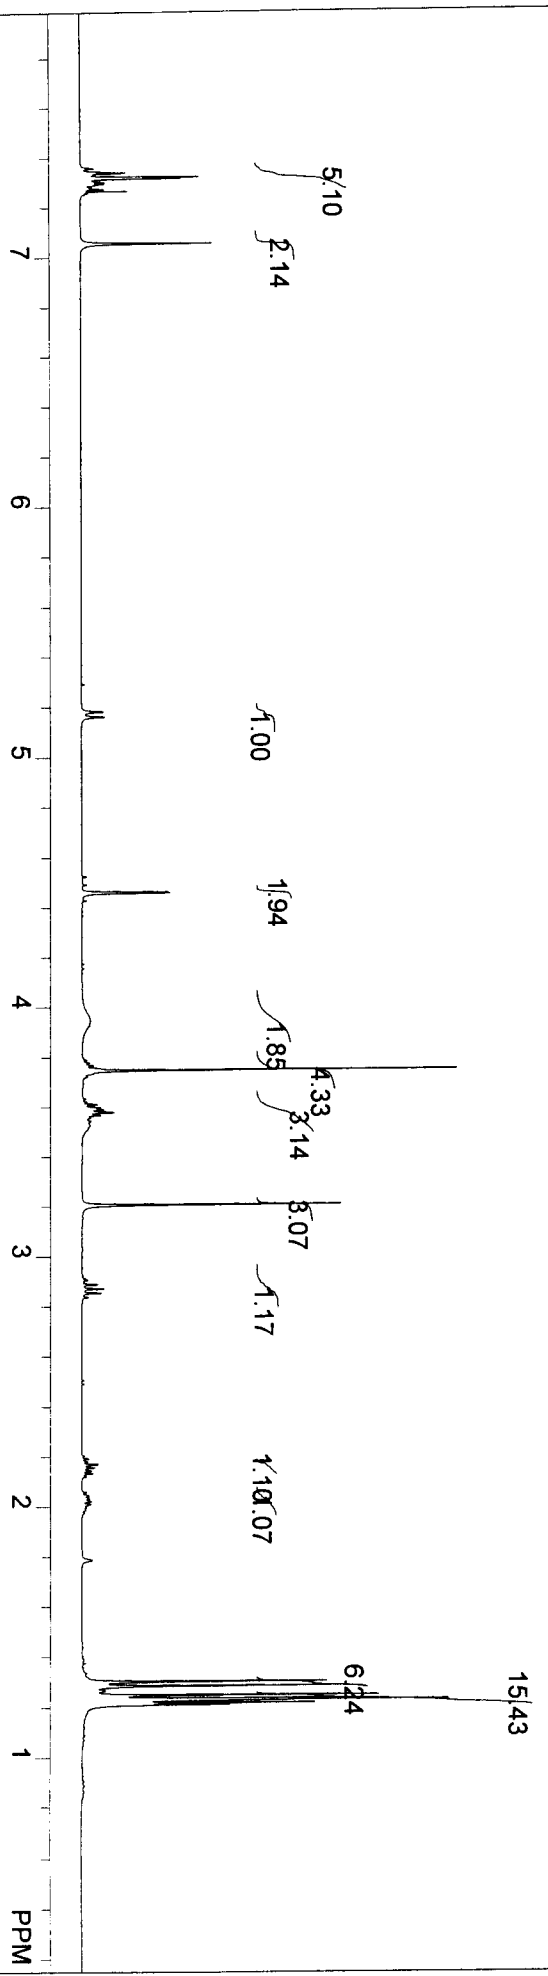

h-5

|                                                                  |  |             |  |           |  |           |  |             |  |             |  |        |  |         |  |              |  |                    |  |
|------------------------------------------------------------------|--|-------------|--|-----------|--|-----------|--|-------------|--|-------------|--|--------|--|---------|--|--------------|--|--------------------|--|
| proton atm.                                                      |  | F1: 400.191 |  | F2: 1.000 |  | SW1: 8278 |  | PD: 1.0 sec |  | OF1: 2004.6 |  | NA: 16 |  | LB: 0.1 |  | PTSID: 32768 |  | WinNuts - \$221T.1 |  |
| EX: USER: temple -- DATE: Nov 14 19:17:19 2007 EST (UT-5h) templ |  |             |  |           |  |           |  |             |  |             |  |        |  |         |  |              |  |                    |  |

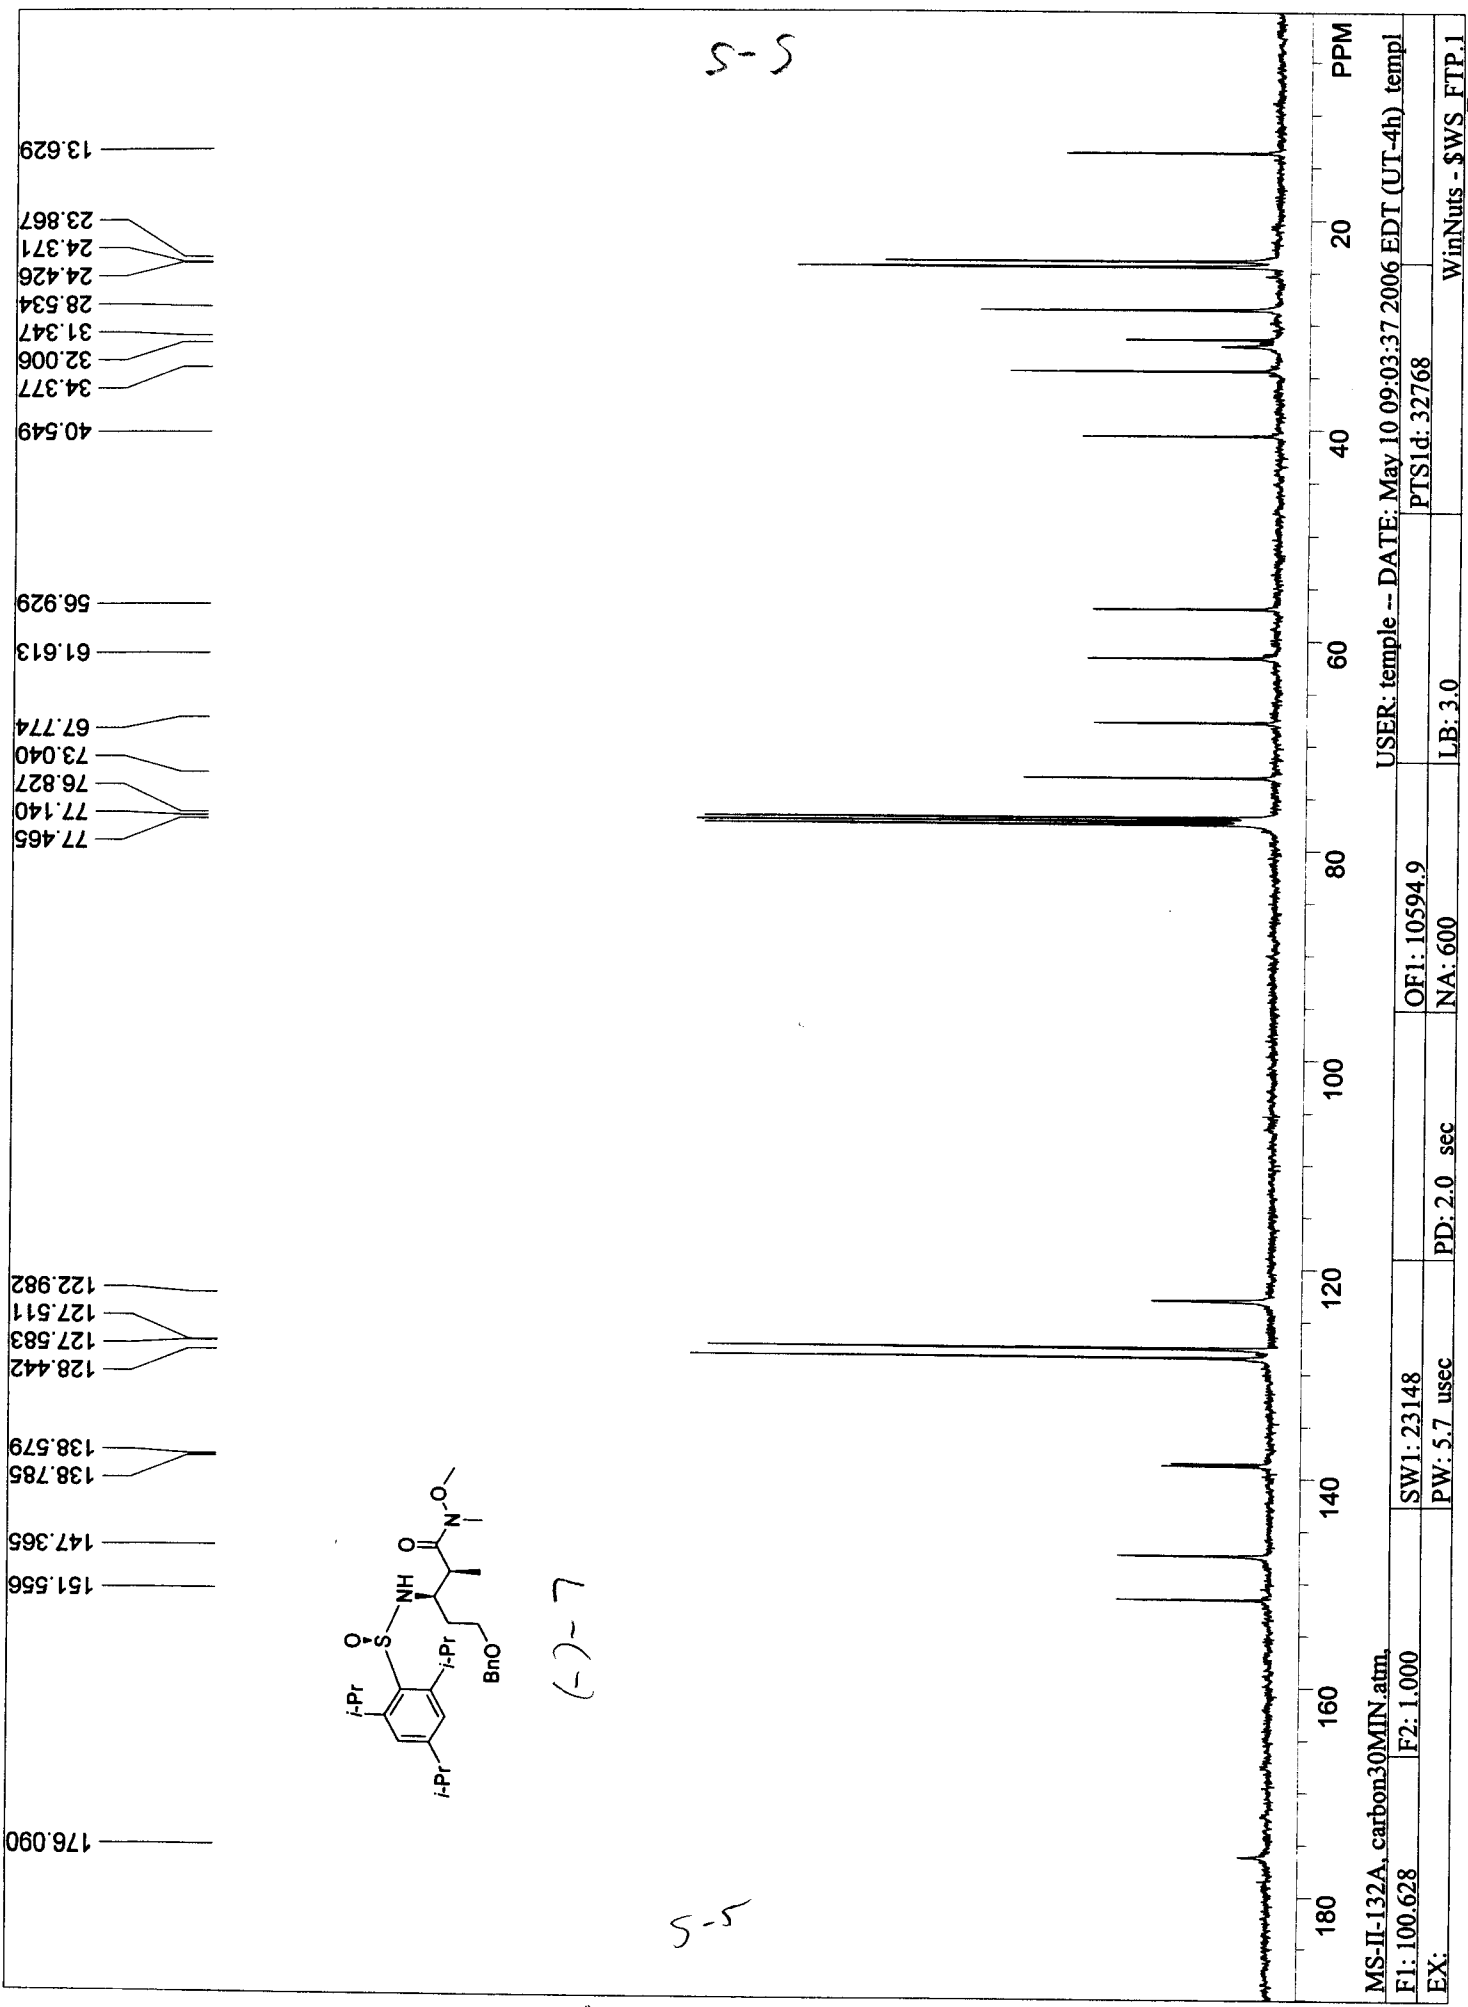

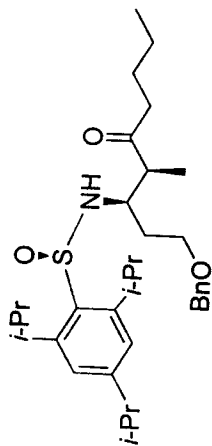

(-)-8

9-5

5-6

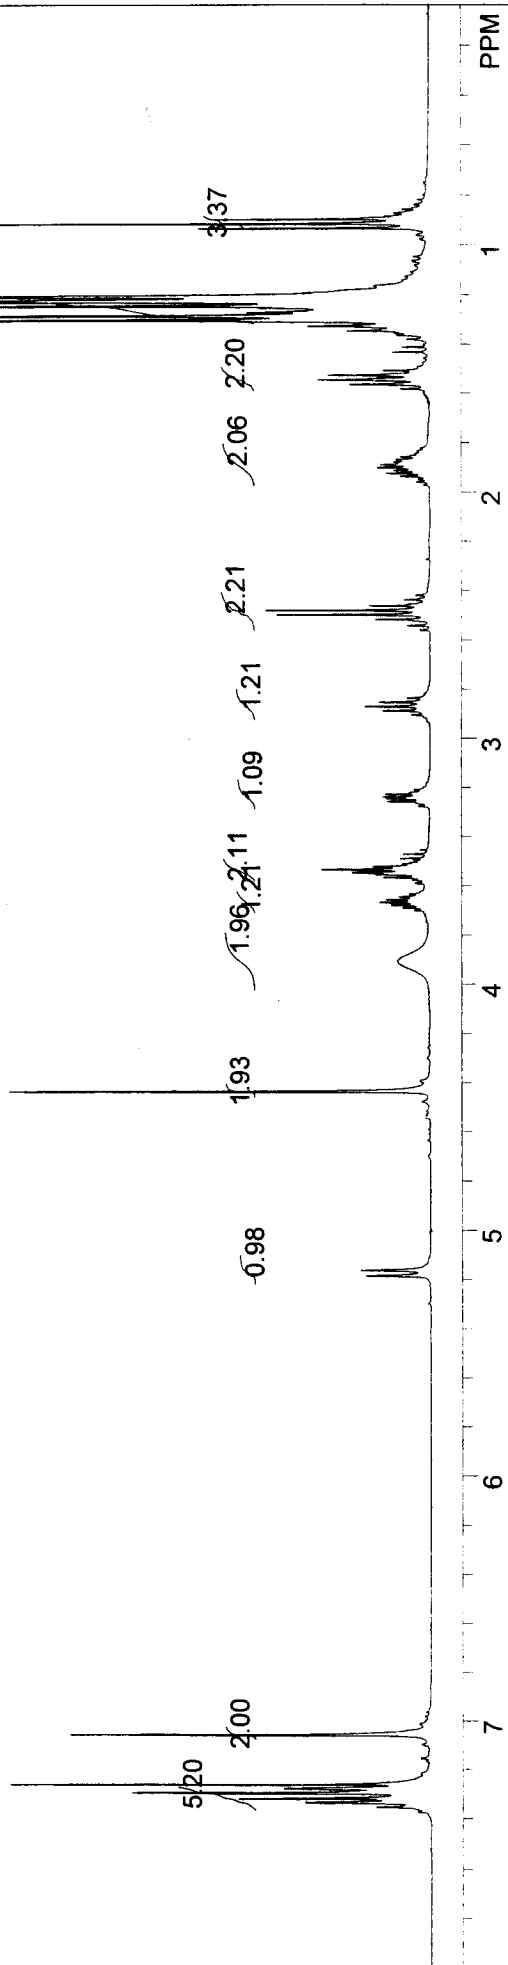

|                         |              |                                                              |                    |
|-------------------------|--------------|--------------------------------------------------------------|--------------------|
| MS-II-138A, proton.atm. |              | USER: temple -- DATE: May 17 17:42:41 2006 EDT (UT-4h) temp/ |                    |
| F1: 400.191             | F2: 1.000    | OF1: 2002.1                                                  | PTS1d: 32768       |
| EX:                     | PW: 9.8 usec | NA: 16                                                       | LB: 0.1            |
|                         | PD: 1.0 sec  |                                                              | WinNuts - \$221T.1 |

L-5

24.521  
24.412

77.510  
77.194  
76.870

128.558  
127.748  
127.549

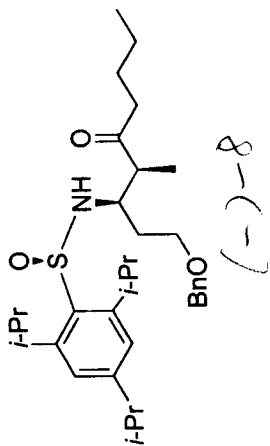

S-7

|                               |                                                              |
|-------------------------------|--------------------------------------------------------------|
| MS-II-138A, pendant90MIN.atm. | USER: temple -- DATE: May 17 18:38:13 2006 EDT (UT-4h) templ |
| F1: 100.629 F2: 1.000         | PTSId: 65536                                                 |
| EX:                           | WinNuts - \$221T.1                                           |
| SW1: 25126                    | OF1: 10823.7                                                 |
| PW: 5.7 usec                  | NA: 600                                                      |
|                               | PD: 4.0 sec                                                  |
|                               | LB: 3.0                                                      |
| 200                           | 150                                                          |
| 100                           | 50                                                           |
| 0                             | PPM                                                          |

8-5

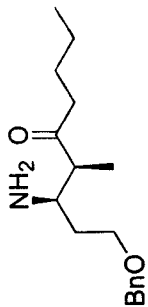

(+)-9

5-8

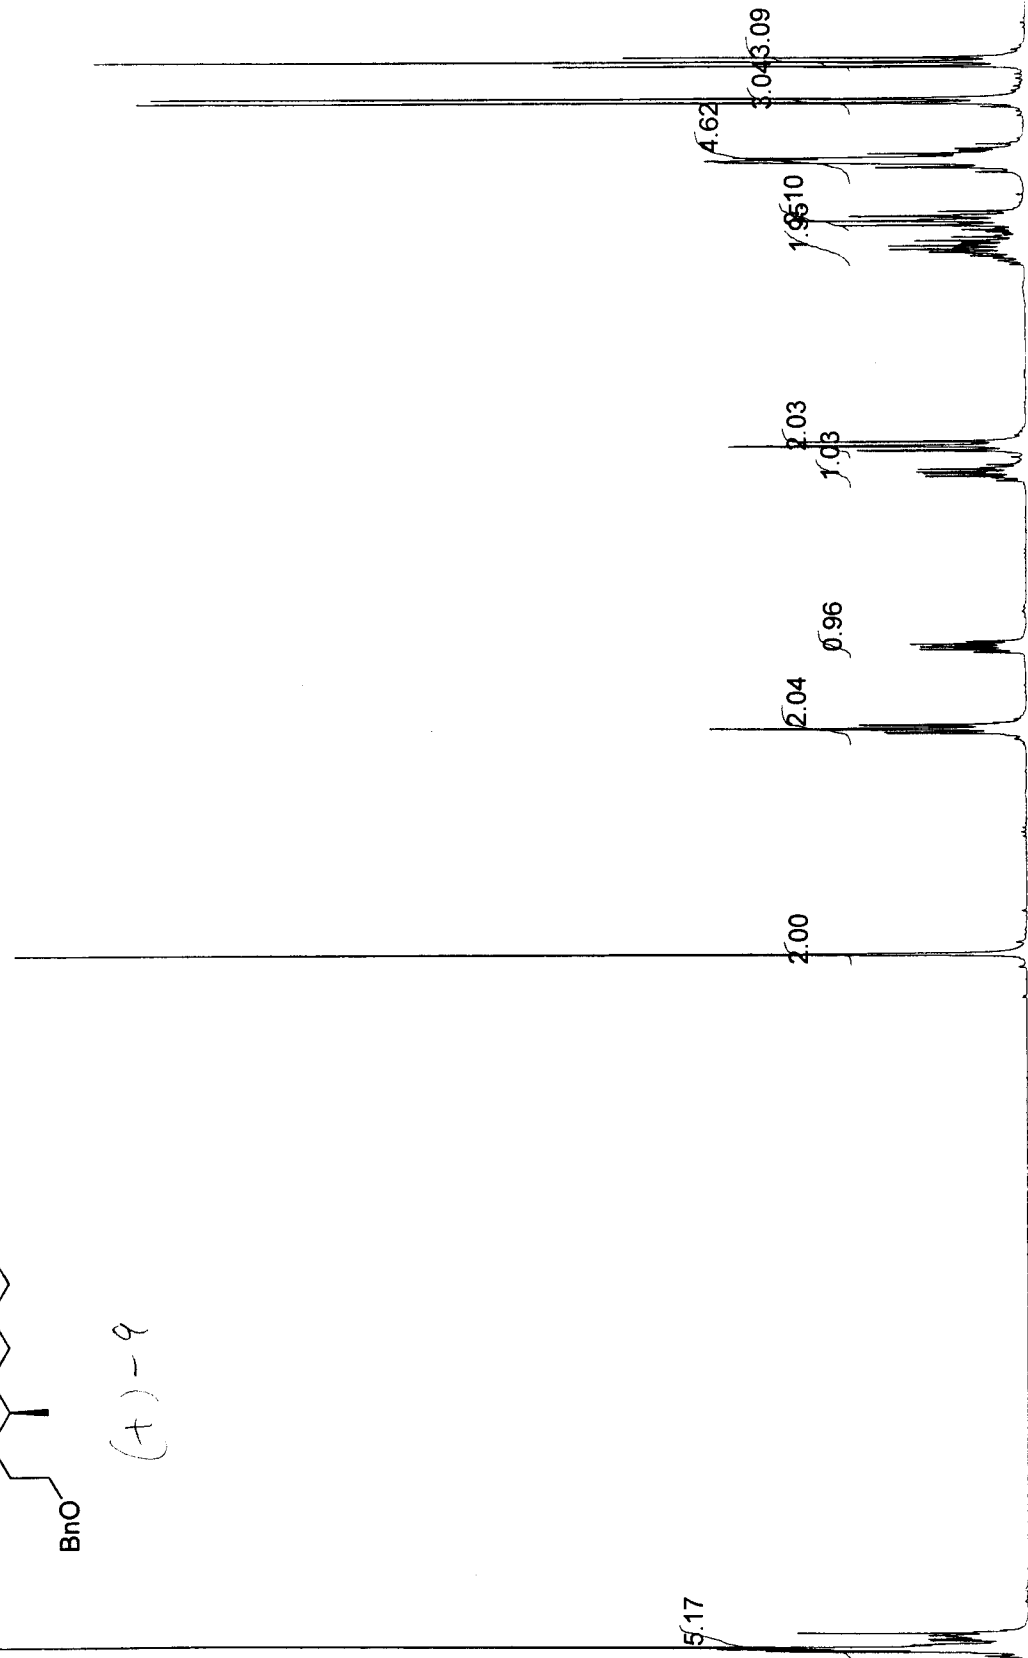

|                         |                                                               |
|-------------------------|---------------------------------------------------------------|
| MS-II-224A, proton.atm. | USER: temple -- DATE: Oct 30 15:40:52 2006 EST (UT-5h) .templ |
| F1: 400.191             | F2: 1.000                                                     |
| EX:                     | PD: 1.0 sec                                                   |
|                         | SW1: 8278                                                     |
|                         | PW: 9.8 usec                                                  |
|                         | OF1: 2001.5                                                   |
|                         | NA: 16                                                        |
|                         | PTS1d: 32768                                                  |
|                         | LB: 0.1                                                       |
|                         | W/inNuts - \$221T.1                                           |



6-5

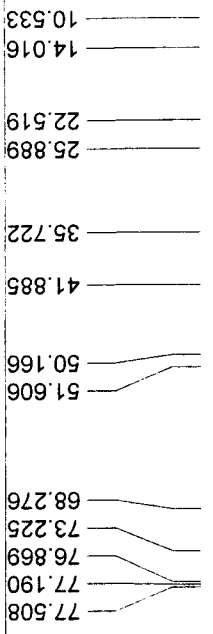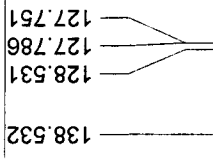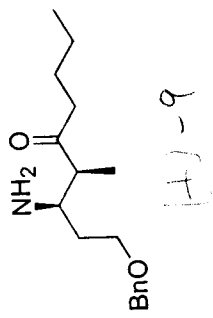

6-5

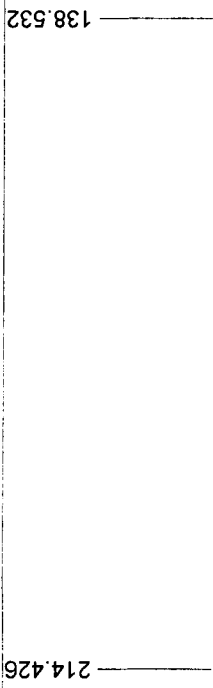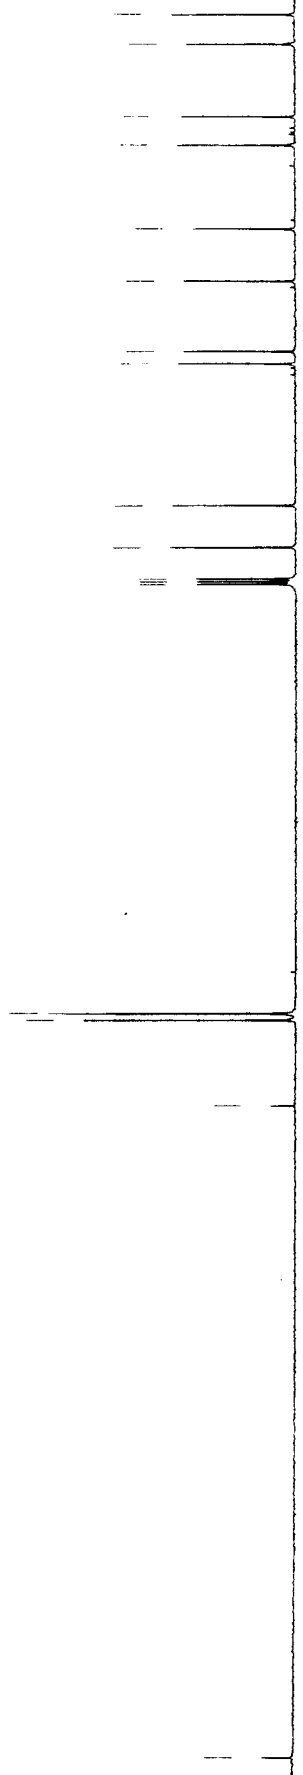

|                              |                                                              |
|------------------------------|--------------------------------------------------------------|
| MS-IL-224A, carbon30MIN.atm, | USER: temple -- DATE: Oct 30 16:44:07 2006 EST (UT-5h) templ |
| F1: 100.628                  | F2: 1.000                                                    |
| EX:                          | PTSId: 32768                                                 |
|                              | LB: 3.0                                                      |
|                              | NA: 1024                                                     |
|                              | PD: 2.0 sec                                                  |
|                              | PW: 5.7 usec                                                 |
|                              | SW1: 23148                                                   |
|                              | OFI: 10600.7                                                 |
|                              | WinNuts - \$221T.1                                           |

01-5

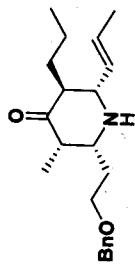

(-)-11

S-10

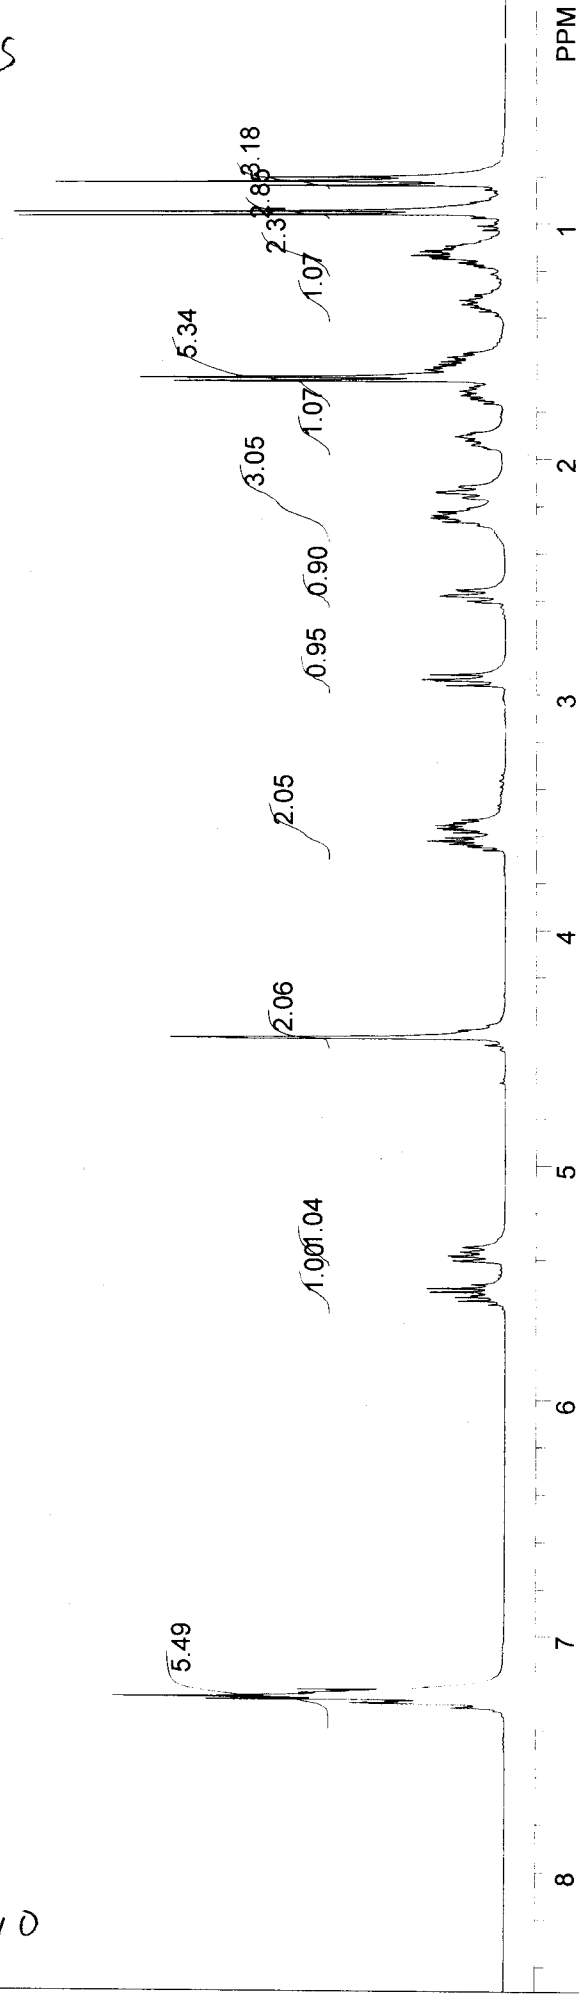

2. proton.atm. 1024  
 F1: 400.130 F2: 1.000  
 EX: SW1: 8013 PW: 9.8 usec PD: 1.0 sec OF1: 1990.8 NA: 16  
 USER: temple -- DATE: Apr 1 10:23:06 2008 EST (UT-5h) templ  
 PTS1d: 32768  
 LB: 0.1  
 WinNuts - \$221T.1

11-5

10.271  
14.484  
17.814  
21.124  
27.516  
33.893  
50.787  
55.842  
62.533  
65.226  
68.577  
73.130  
76.178  
76.291  
76.348  
76.780  
77.099  
77.418  
77.828  
77.922  
77.967  
78.041  
78.091

132.605  
128.771  
128.569  
128.474  
127.697  
127.623

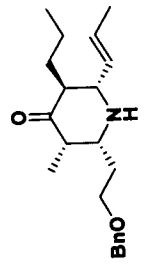

(-)-11

5-11

|                              |                                                              |
|------------------------------|--------------------------------------------------------------|
| MS-II-301A, pendant90MIN.atm | USER: temple -- DATE: May 19 15:43:37 2007 EDT (UT-4h) templ |
| F1: 100.629                  | PTSId: 65536                                                 |
| F2: 1.000                    | LB: 3.0                                                      |
| EX:                          | WinNuts - \$221T.1                                           |
| SW1: 25126                   | OF1: 10815.1                                                 |
| PW: 5.7 usec                 | NA: 1160                                                     |
| PD: 4.0 sec                  |                                                              |

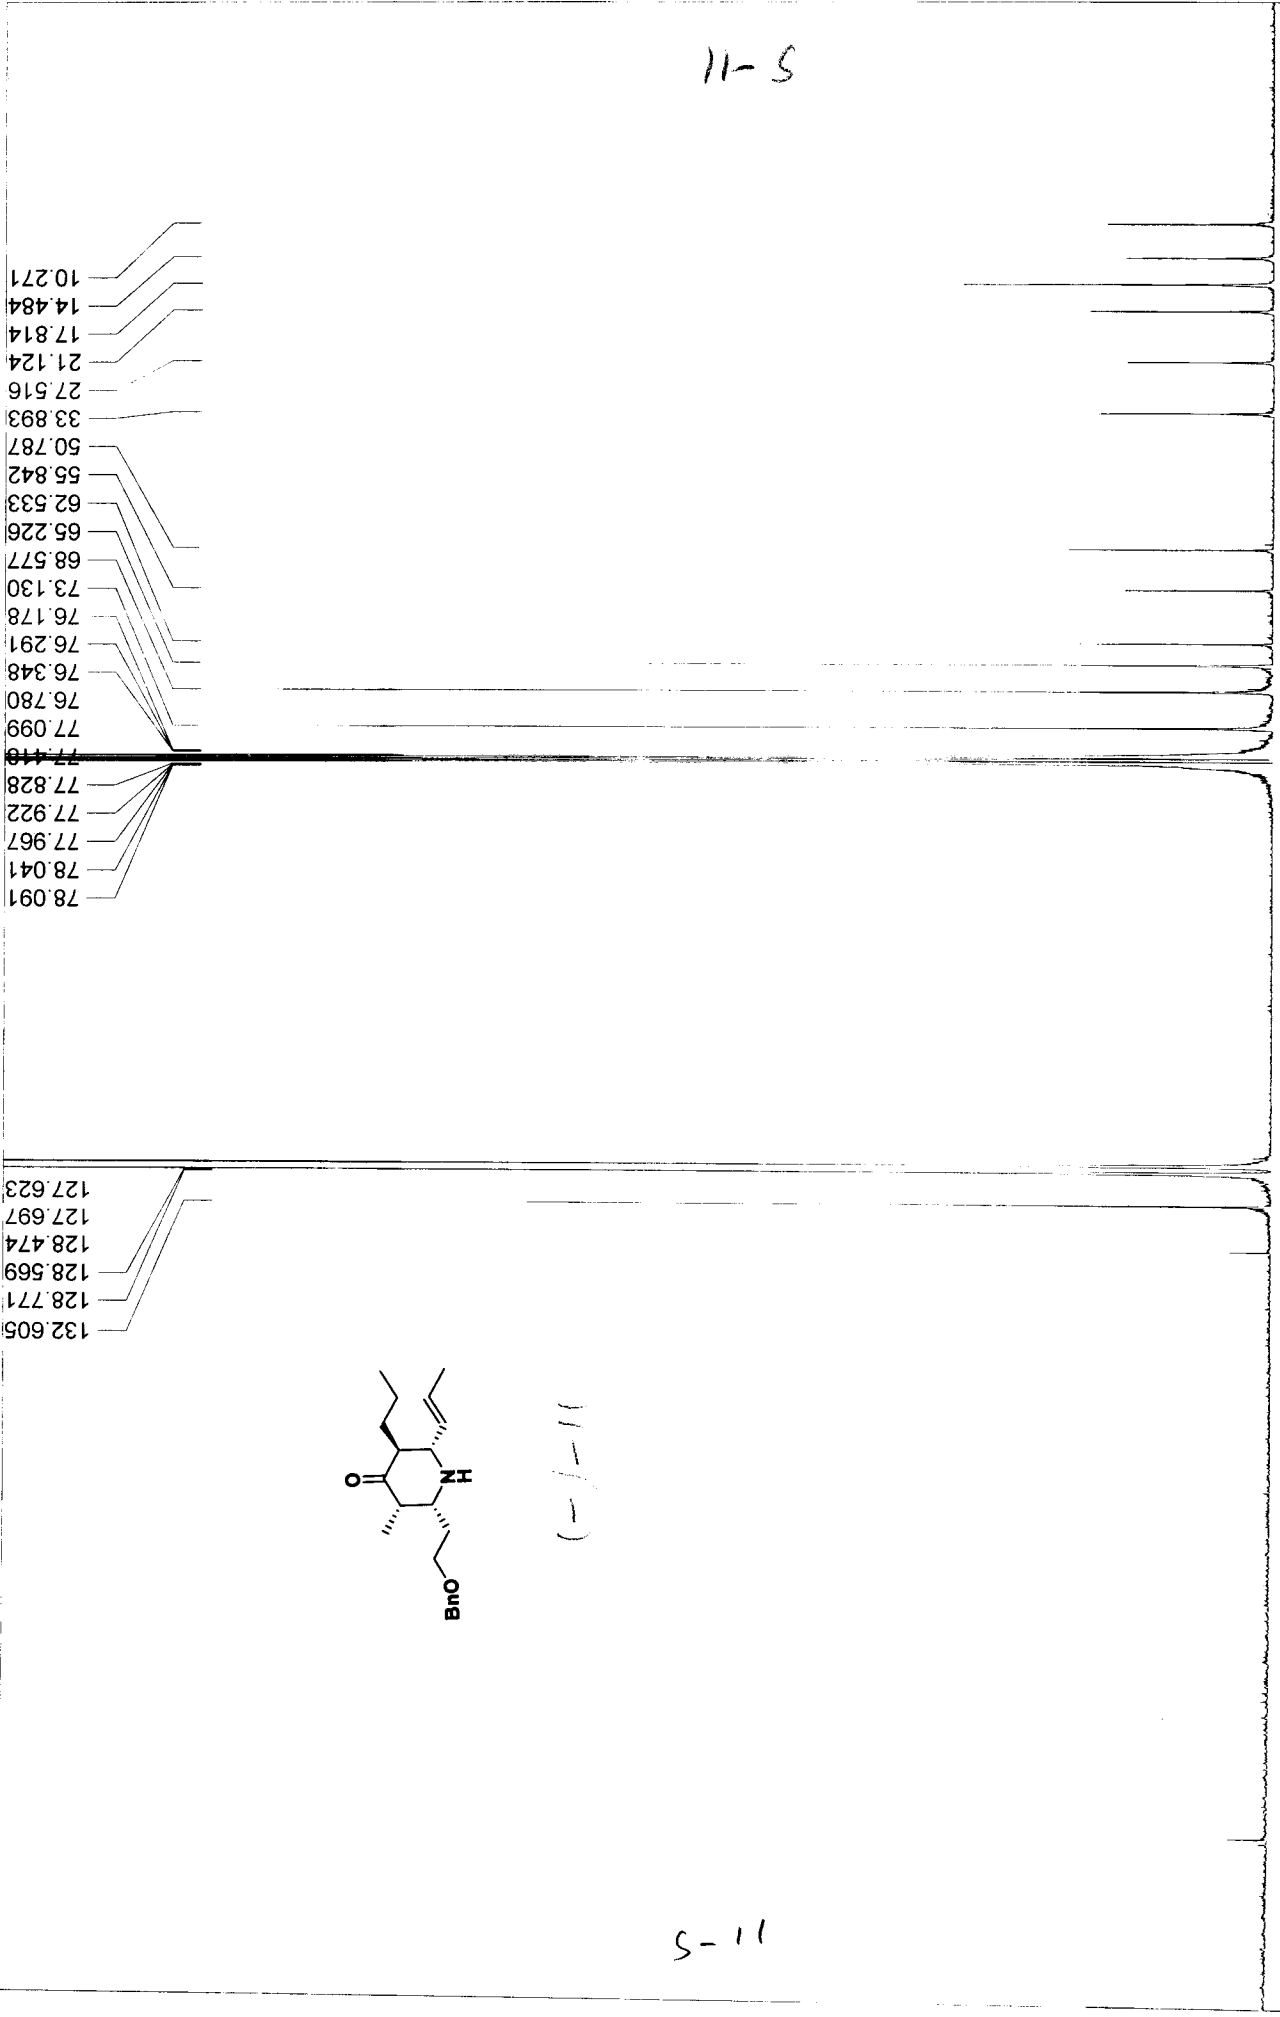

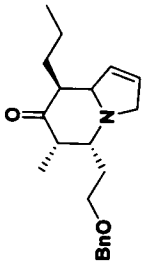

(+)-13

S-12

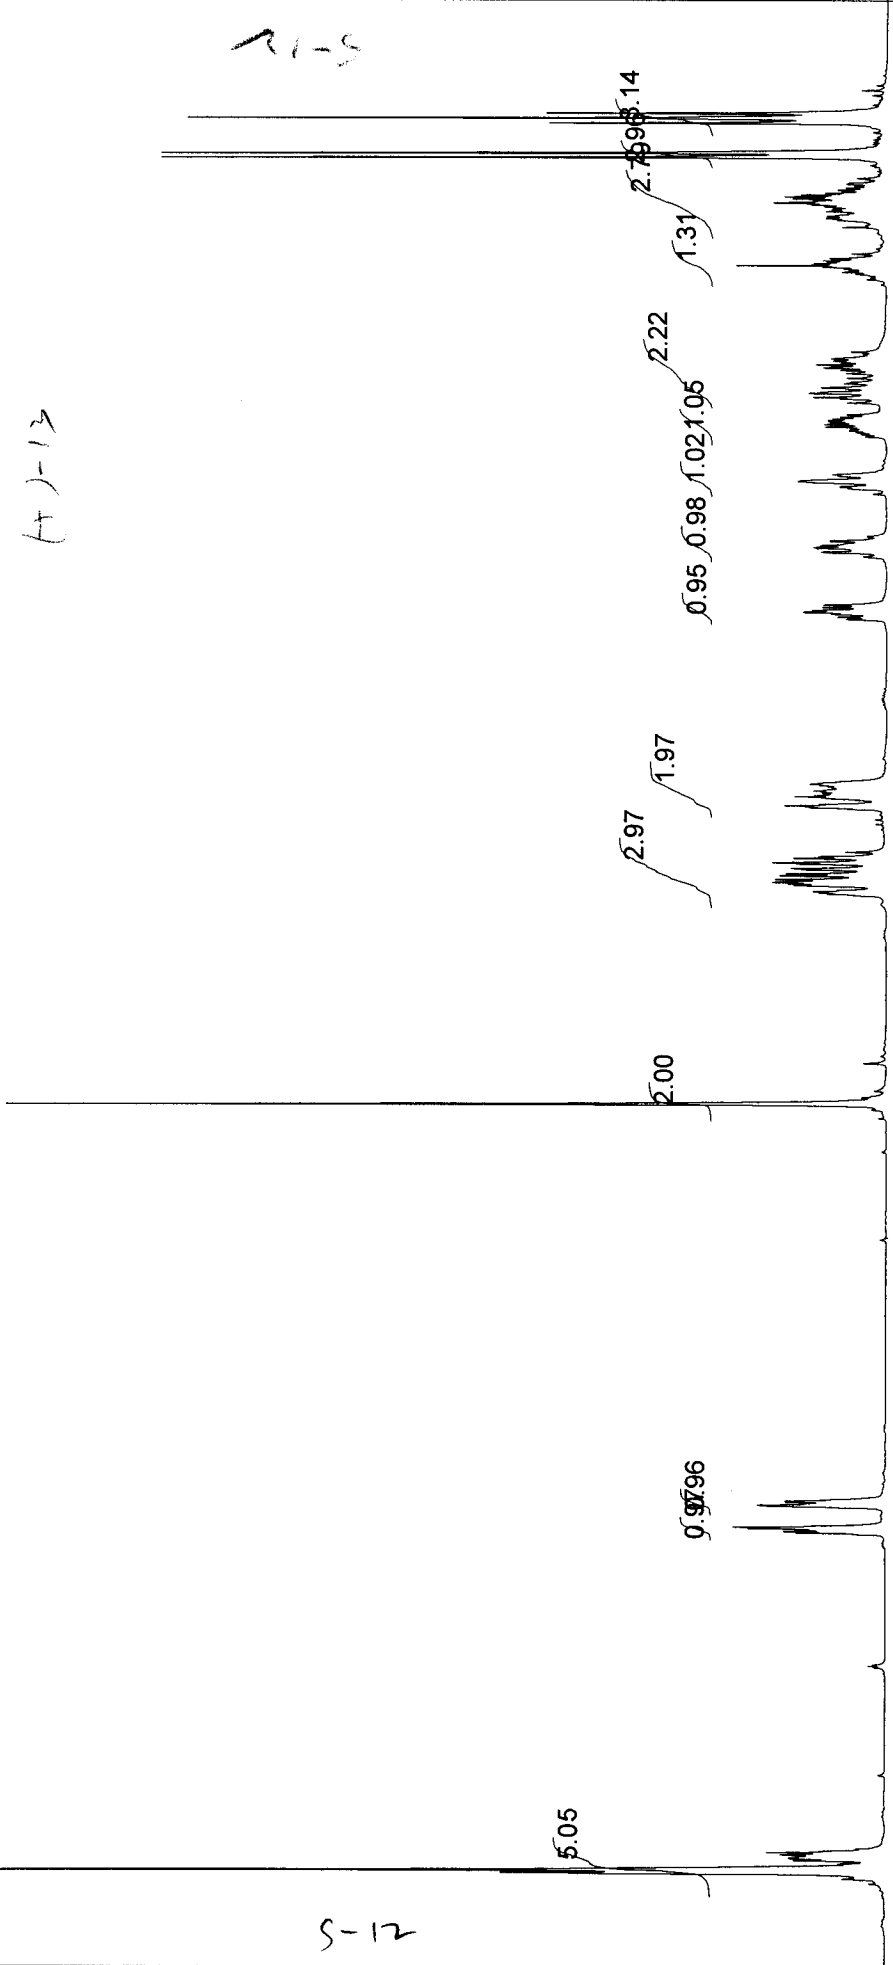

S-12

|                           |              |                                                            |                      |
|---------------------------|--------------|------------------------------------------------------------|----------------------|
| MS-III-96B-2, proton.atm. |              | USER: temple -- DATE: Jul 3 15:50:02 2007 EDT (UT-4h) temp |                      |
| F1: 400.191               | F2: 1.000    | OF1: 1972.2                                                | PTSId: 32768         |
| EX:                       | PW: 9.8 usec | NA: 16                                                     | LB: 0.1              |
|                           | PD: 1.0 sec  |                                                            | WinNuts - \$Minsoc.1 |

S-13

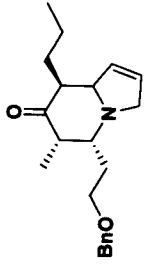

(+)-13

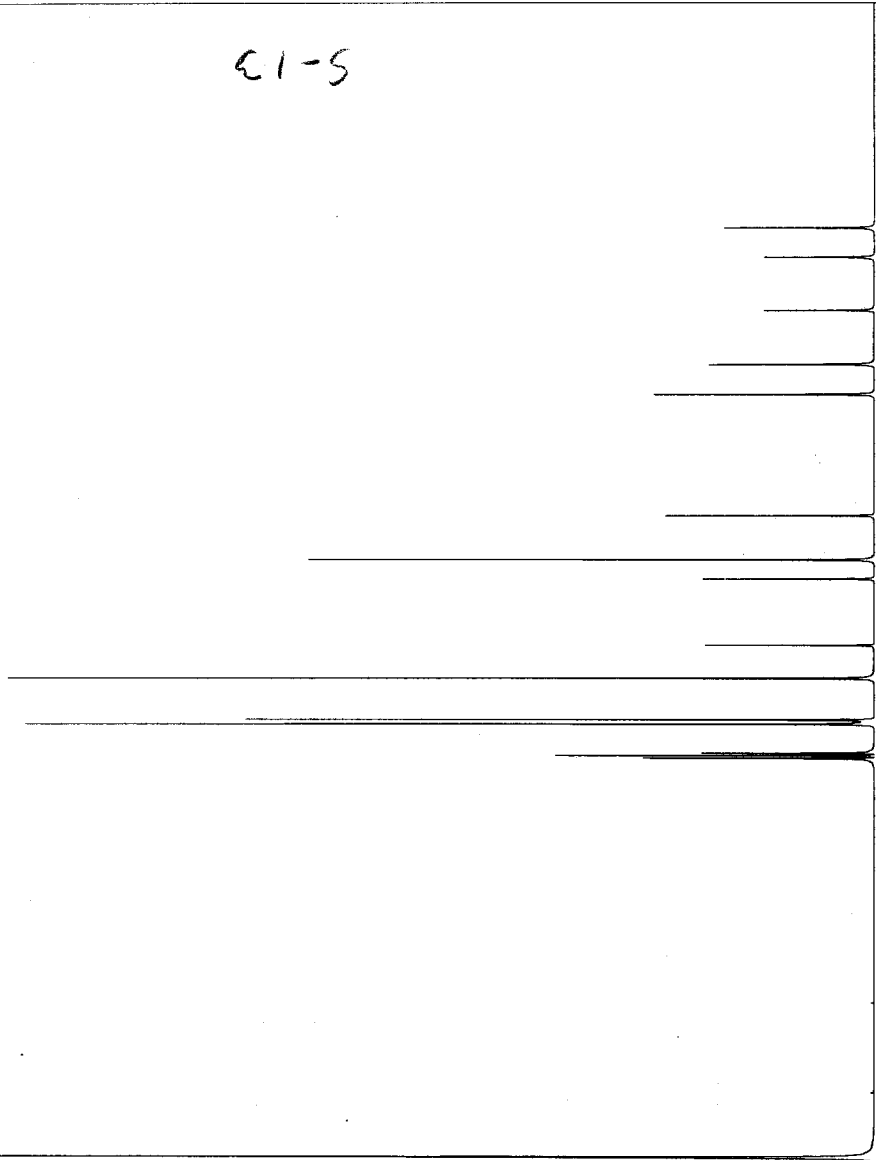

200 150 100 50 0 PPM

S-13

|                                |           |                                                             |                      |
|--------------------------------|-----------|-------------------------------------------------------------|----------------------|
| MS-III-96B-2.pendant10MIN.atm. |           | USER: temple -- DATE: Jul 3 16:43:19 2007 EDT (UT-4h) templ |                      |
| F1: 100.629                    | F2: 1.000 | OF1: 10875.4                                                | PTS1d: 65536         |
| EX:                            |           | PD: 4.0 sec                                                 | LB: 3.0              |
|                                |           | SW1: 25126                                                  | WinNuts - \$WS FTP.1 |
|                                |           | PW: 5.7 usec                                                |                      |
|                                |           | NA: 560                                                     |                      |

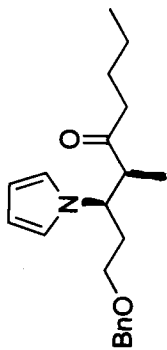

(+)-14

h1-5

5-14

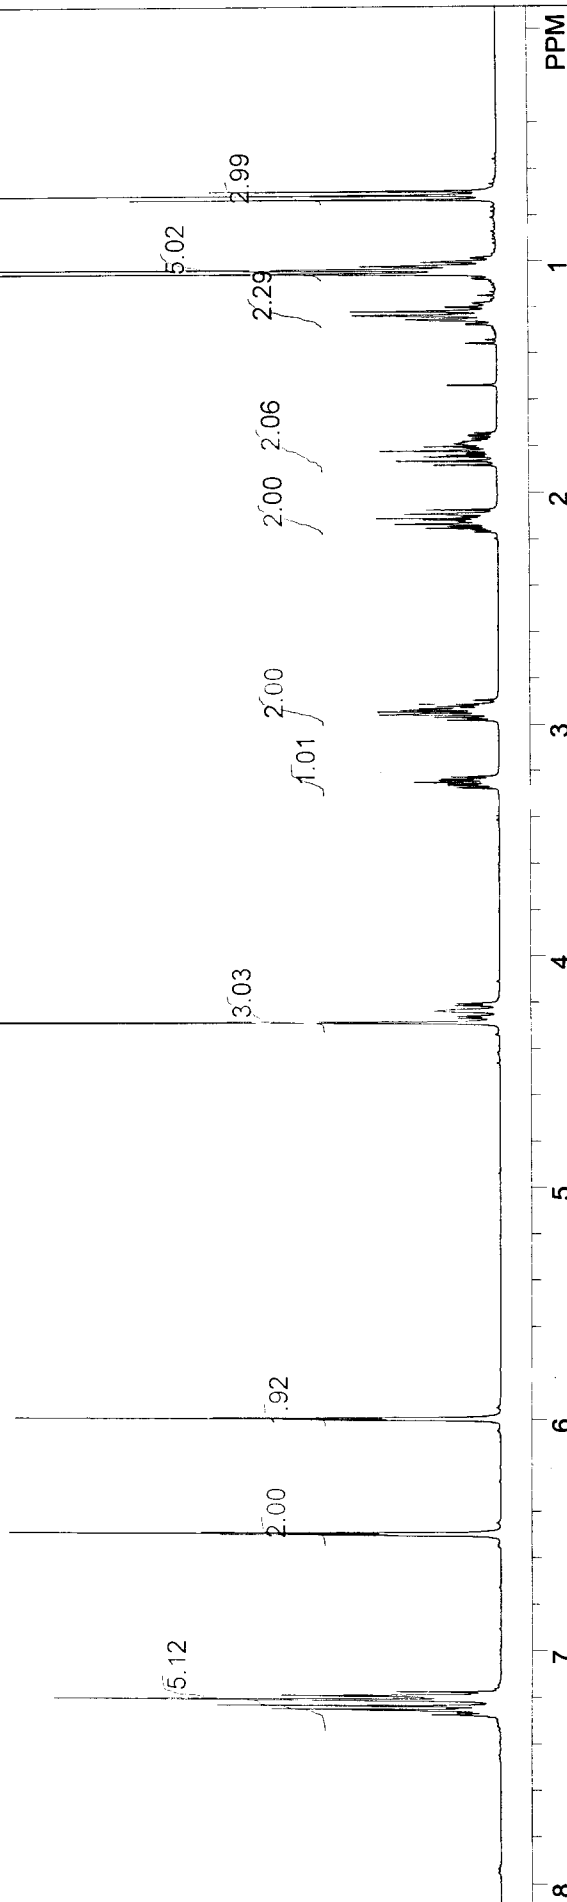

|                         |           |                                                             |                      |
|-------------------------|-----------|-------------------------------------------------------------|----------------------|
| MS-III-44A, proton.atm. |           | USER: temple -- DATE: Apr 9 13:27:47 2007 EDT (UT-4h) templ |                      |
| F1: 400.191             | F2: 1.000 | OF1: 1970.0                                                 | PTS1d: 32768         |
| EX:                     |           | PD: 1.0 sec                                                 | WinNuts - \$WS FTP.1 |
|                         |           | NA: 16                                                      | LB: 0.1              |

S-15

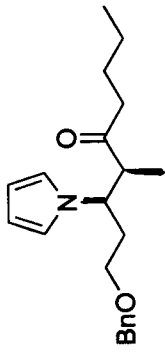

(4)-14

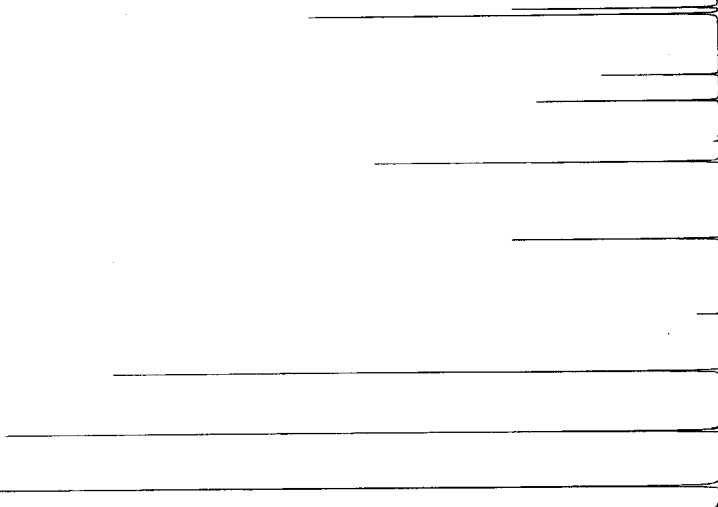

S-15

| pendant.atm. |              | USER: root -- DATE: Mar 23 09:55:58 2007 EST (UT-5h) templ |                      |
|--------------|--------------|------------------------------------------------------------|----------------------|
| F1: 100.628  | F2: 1.000    | OF1: 10078.8                                               | PTS1d: 65536         |
| EX:          | SW1: 25126   | NA: 1597                                                   | LB: 3.5              |
|              | PW: 5.7 usec | PD: 4.0 sec                                                | WinNuts - \$WS FTP.1 |

200 150 100 50 0 PPM

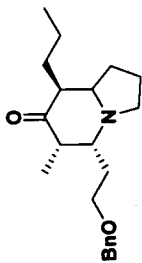

(-)-16

91-5

S-16

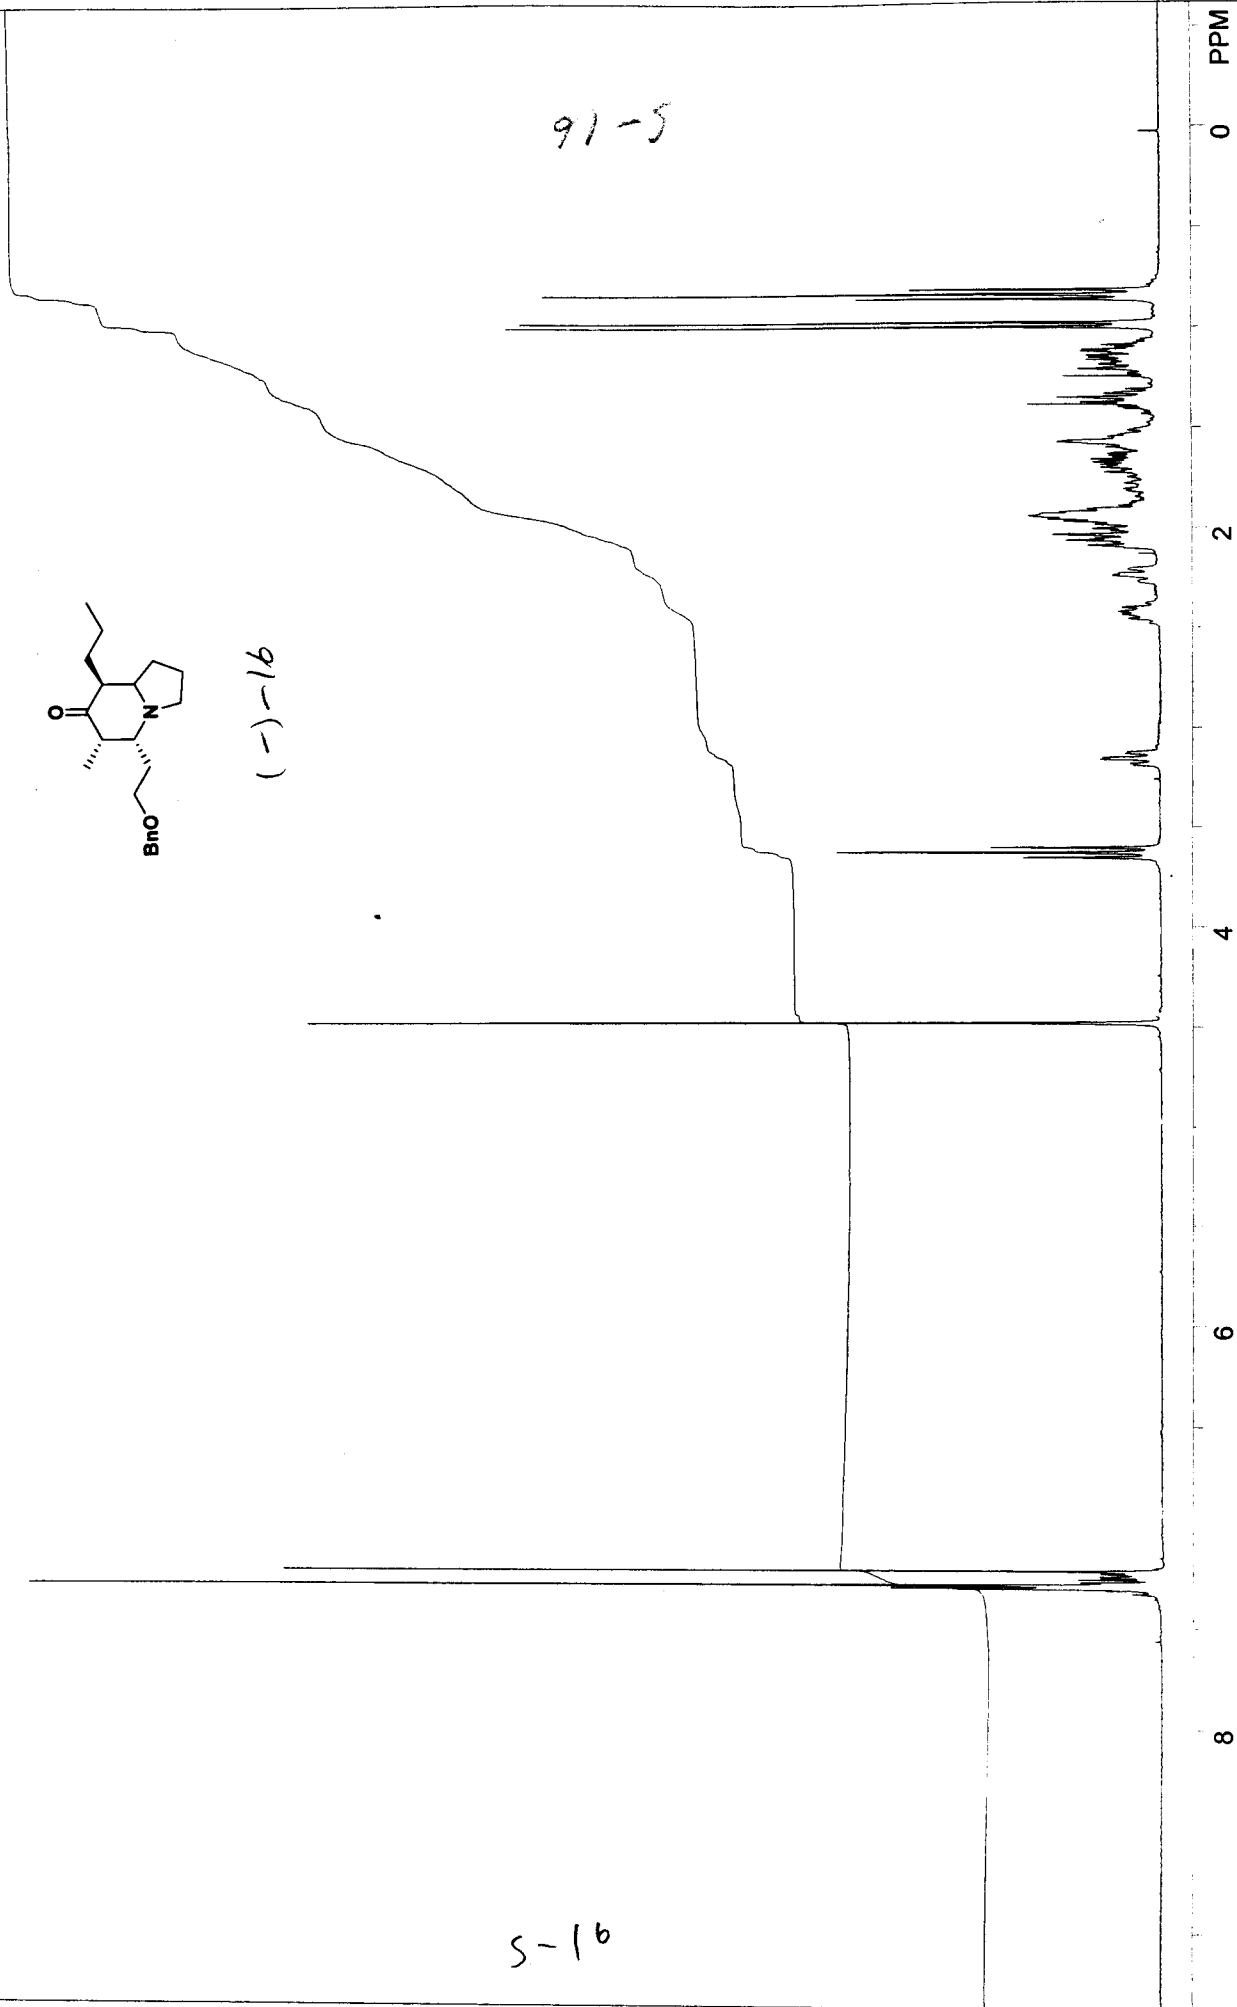

|                                 |                            |
|---------------------------------|----------------------------|
| qh/052008A_21May2008 <i>pmc</i> | USER: -- DATE: May 21 2008 |
| F1: 299.947                     | PTSId: 8192                |
| SW1: 3000                       | OF1: 1312.9                |
| PW: 4.0 usec                    | NA: 8                      |
| PD: 1.0 sec                     | LB: 0.2                    |
| EX: s2pul                       | WinNuts - \$PROTON.fid     |



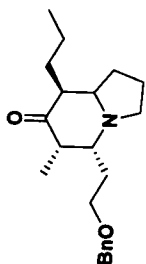

(-)-16

S-17

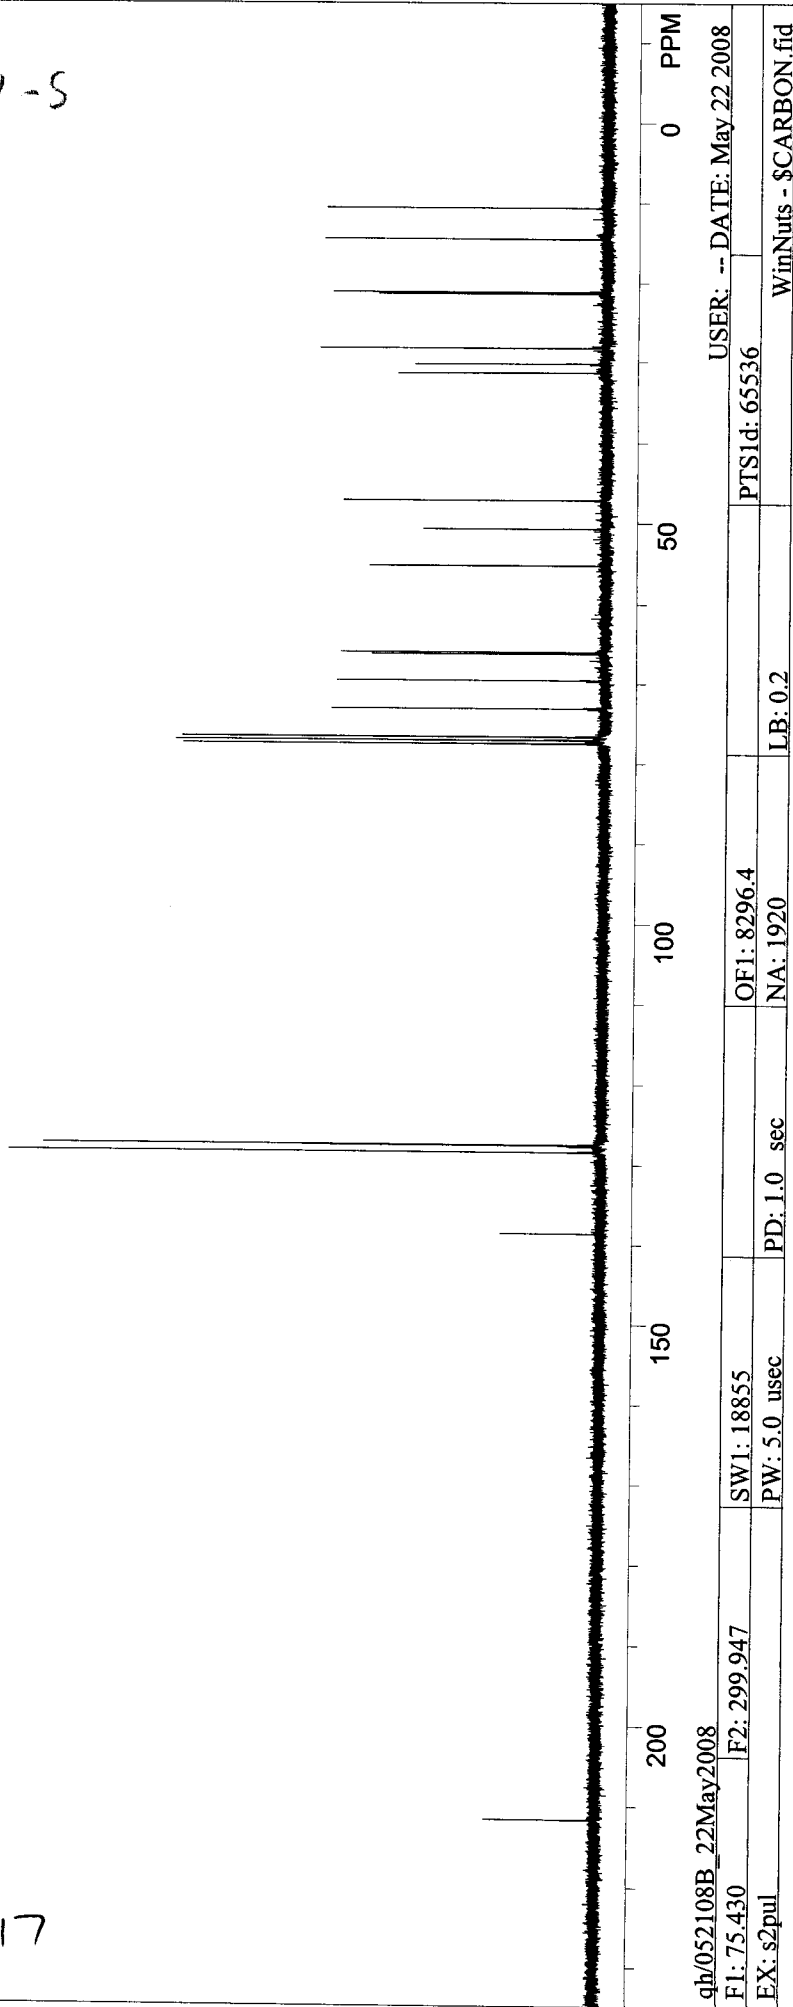

S-17

|                      |                            |
|----------------------|----------------------------|
| qh/052108B_22May2008 | USER: -- DATE: May 22 2008 |
| F1: 75.430           | F2: 299.947                |
| EX: s2pul            | PTSId: 65536               |
|                      | LB: 0.2                    |
|                      | OF1: 8296.4                |
|                      | NA: 1920                   |
|                      | PD: 1.0 sec                |
|                      | SW1: 18855                 |
|                      | PW: 5.0 usec               |
|                      | WinNuts - \$CARBON.fid     |

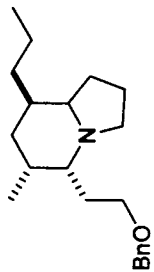

81-5  
 (-)-18

81-5

5-18

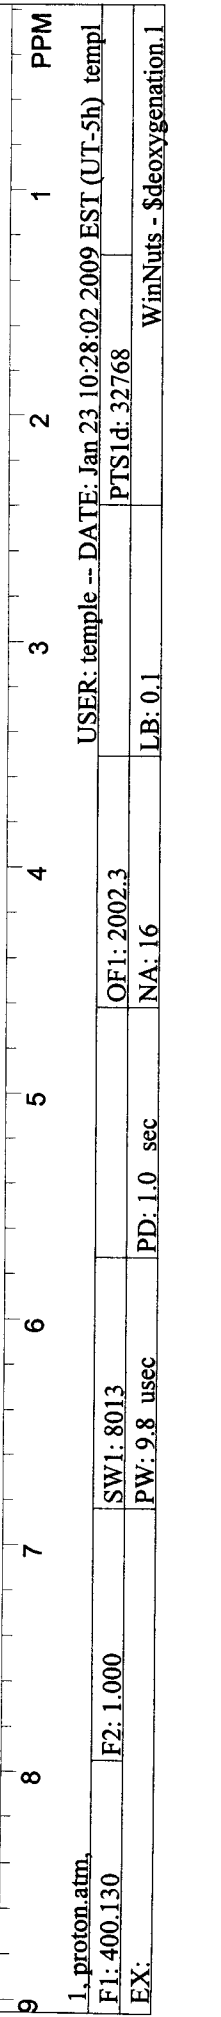

|               |              |                                                              |                            |
|---------------|--------------|--------------------------------------------------------------|----------------------------|
| 1. proton.atm |              | USER: temple -- DATE: Jan 23 10:28:02 2009 EST (UT-5h) templ |                            |
| F1: 400.130   | F2: 1.000    | OF1: 2002.3                                                  | PTSId: 32768               |
| EX:           | PW: 9.8 usec | PD: 1.0 sec                                                  | LB: 0.1                    |
|               |              |                                                              | WinNuts - Sdeoxygenation.1 |

61-S

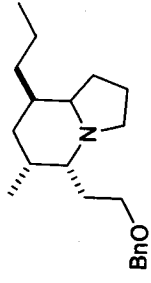

(-) - 18

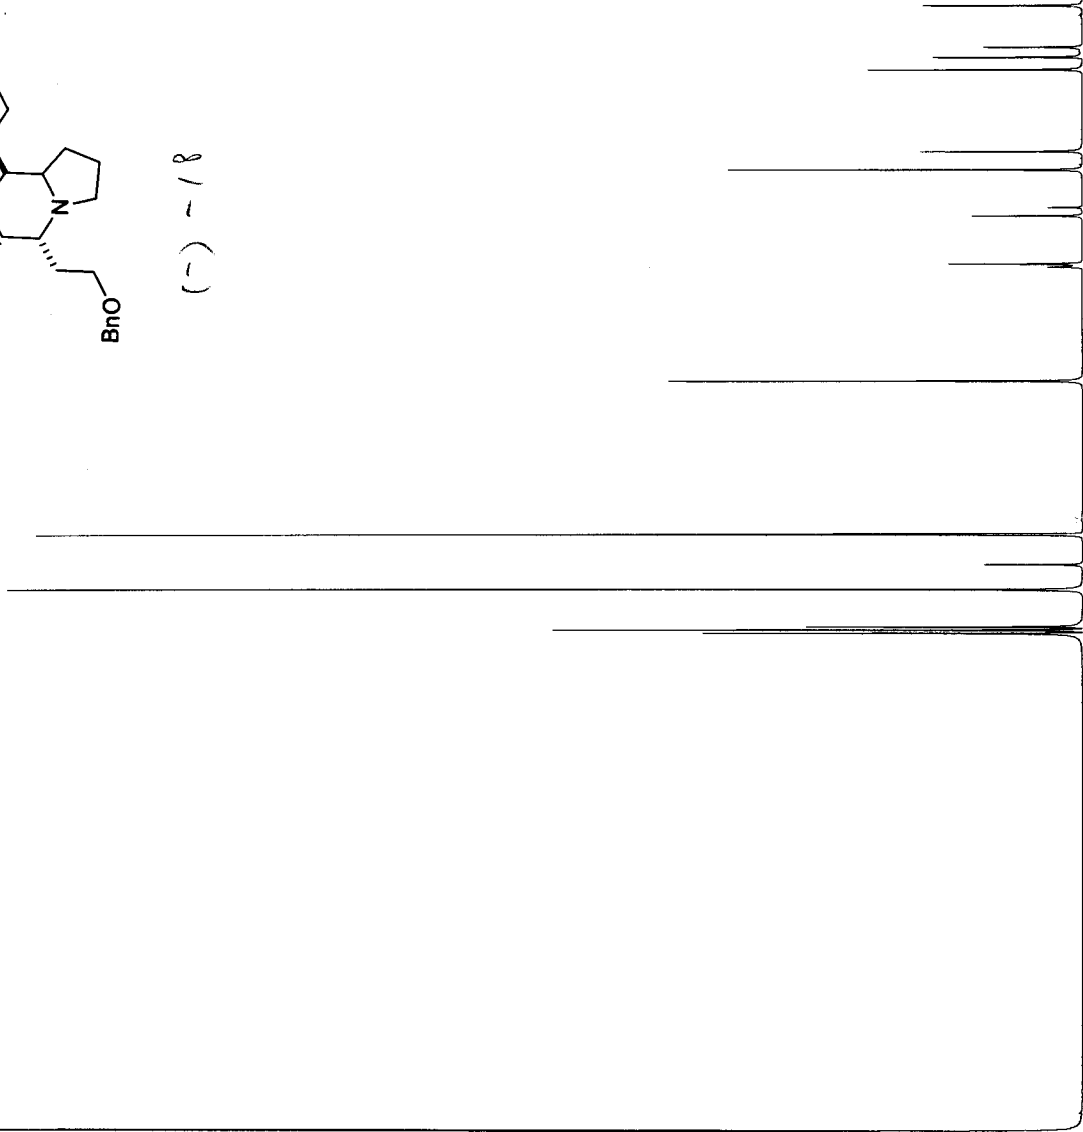

PPM

50

100

150

|                               |                                                              |
|-------------------------------|--------------------------------------------------------------|
| MS-III-89A, pendant90MIN.atm, | USER: temple -- DATE: Jun 20 13:30:50 2007 EDT (UT-4h) templ |
| F1: 100.629                   | F2: 1.000                                                    |
| SW1: 25126                    | OF1: 10808.1                                                 |
| PW: 5.7 usec                  | NA: 1024                                                     |
| EX:                           | PD: 4.0 sec                                                  |
|                               | PTSId: 65536                                                 |
|                               | LB: 3.0                                                      |
|                               | WinNuts - \$WS_FTP.1                                         |

5-19

02-5

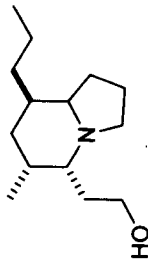

1-)-19

5-20

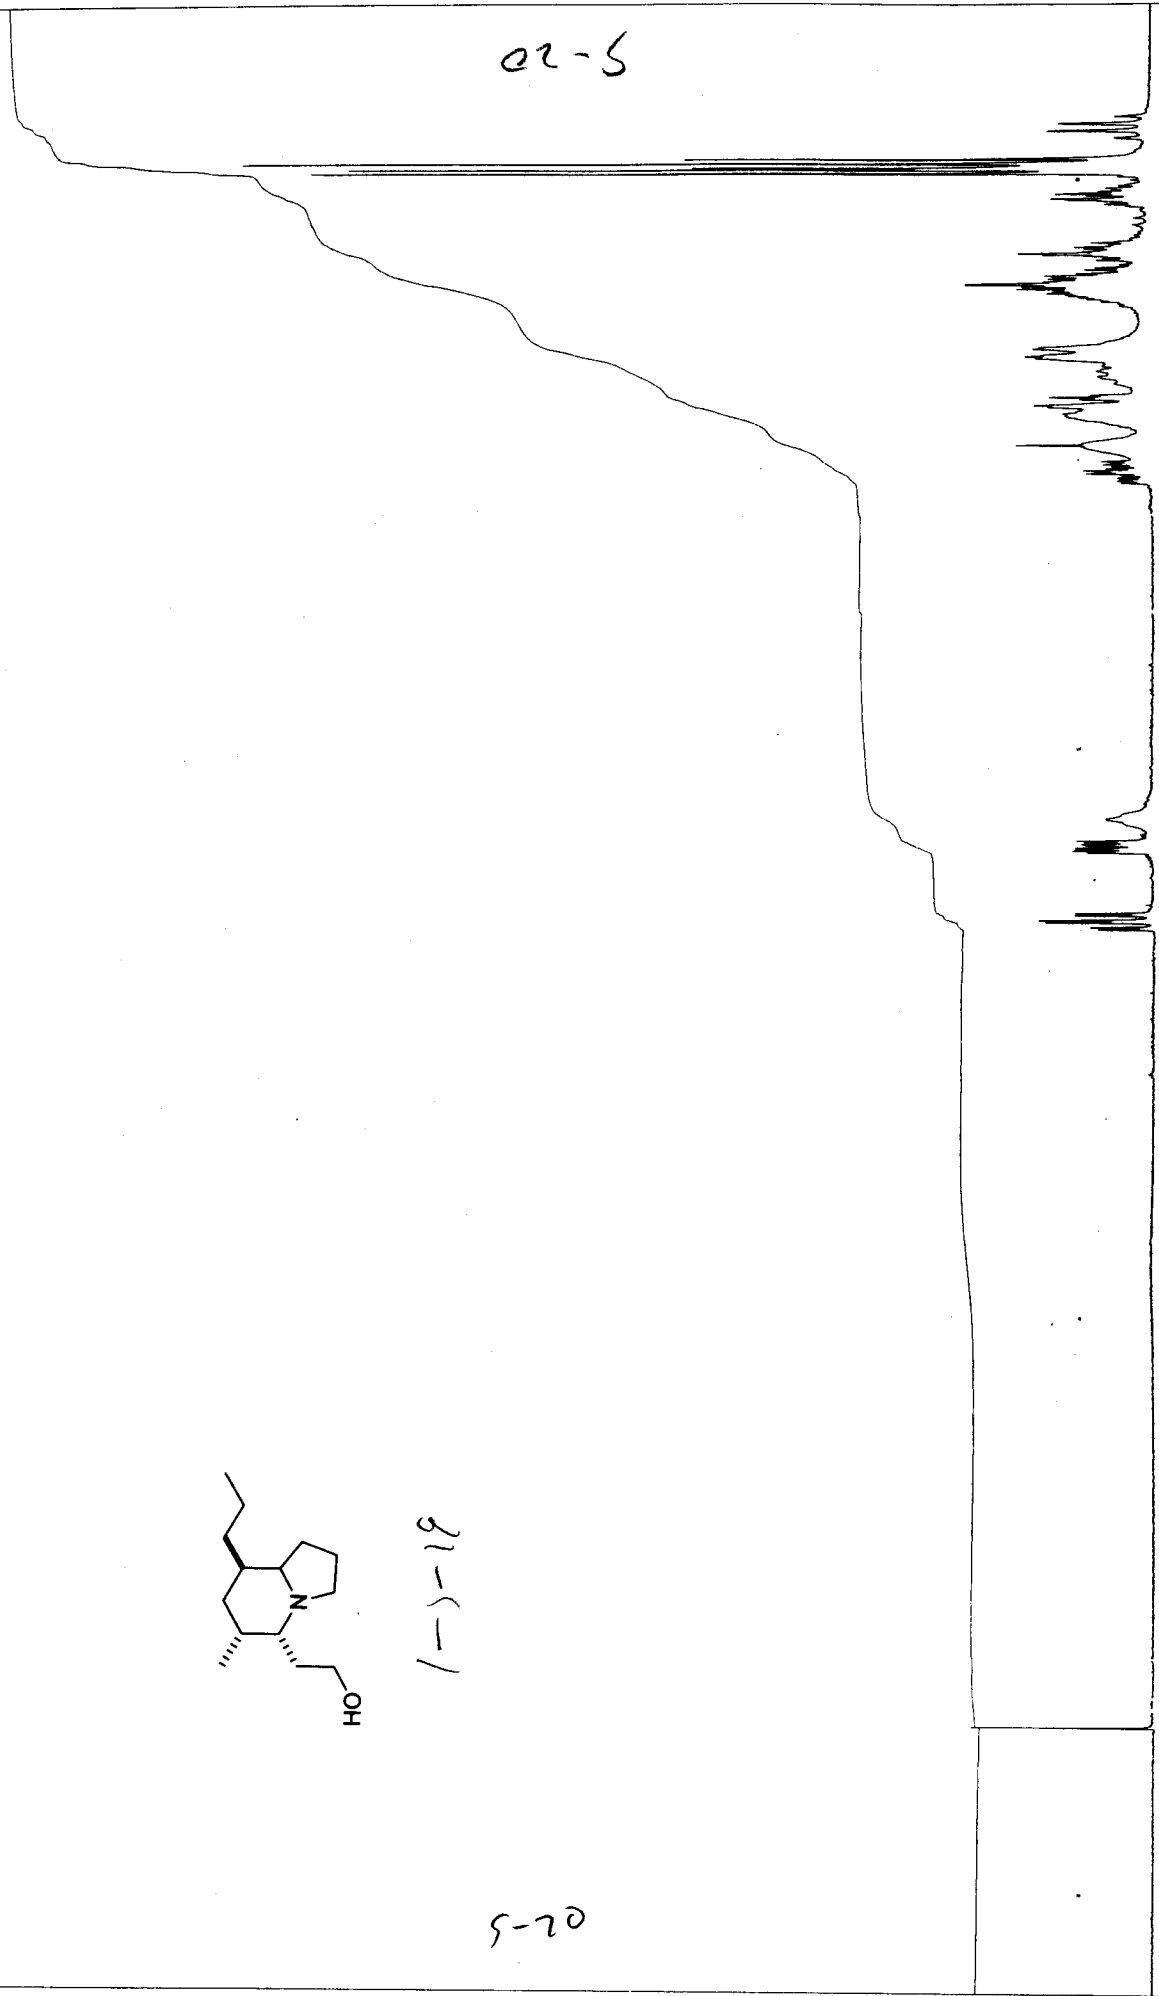

|                                   |                                                        |
|-----------------------------------|--------------------------------------------------------|
| debenzylaton P, proton.atm, 11133 | USER: temple -- DATE: Jan 25 12:56:57 2009 EST (UT-5h) |
| F1: 400.130                       | F2: 1.000                                              |
| EX:                               | PTS1d: 32768                                           |
|                                   | LB: 0.1                                                |
|                                   | WinNuts - SWS_FTP.1                                    |

12-5

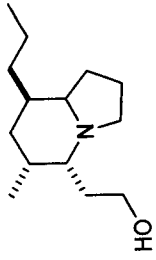

(-)-19

S-21

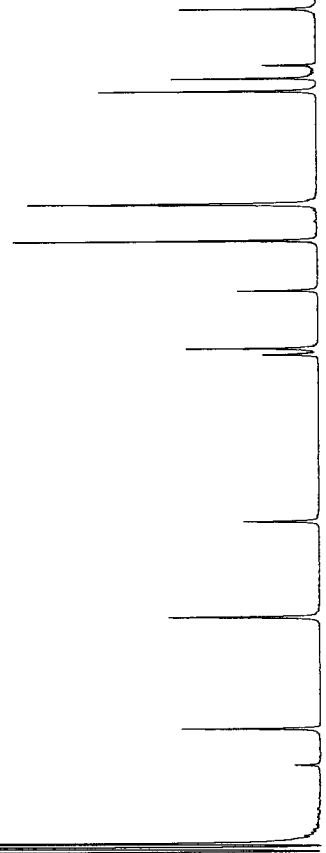

MS-III-106B\_pendant90MIN.atm. USER: temple -- DATE: Jul 14 16:46:04 2007 EDT (UT-4h) templ  
F1: 100.629 F2: 1.000 OF1: 10854.4 PTSId: 65536  
EX: PD: 4.0 sec NA: 1200 LB: 3.0 WinNuts - \$WS\_FTP.1

22-5

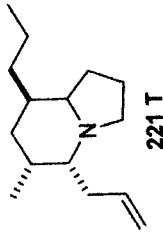

221 T

(-)-1

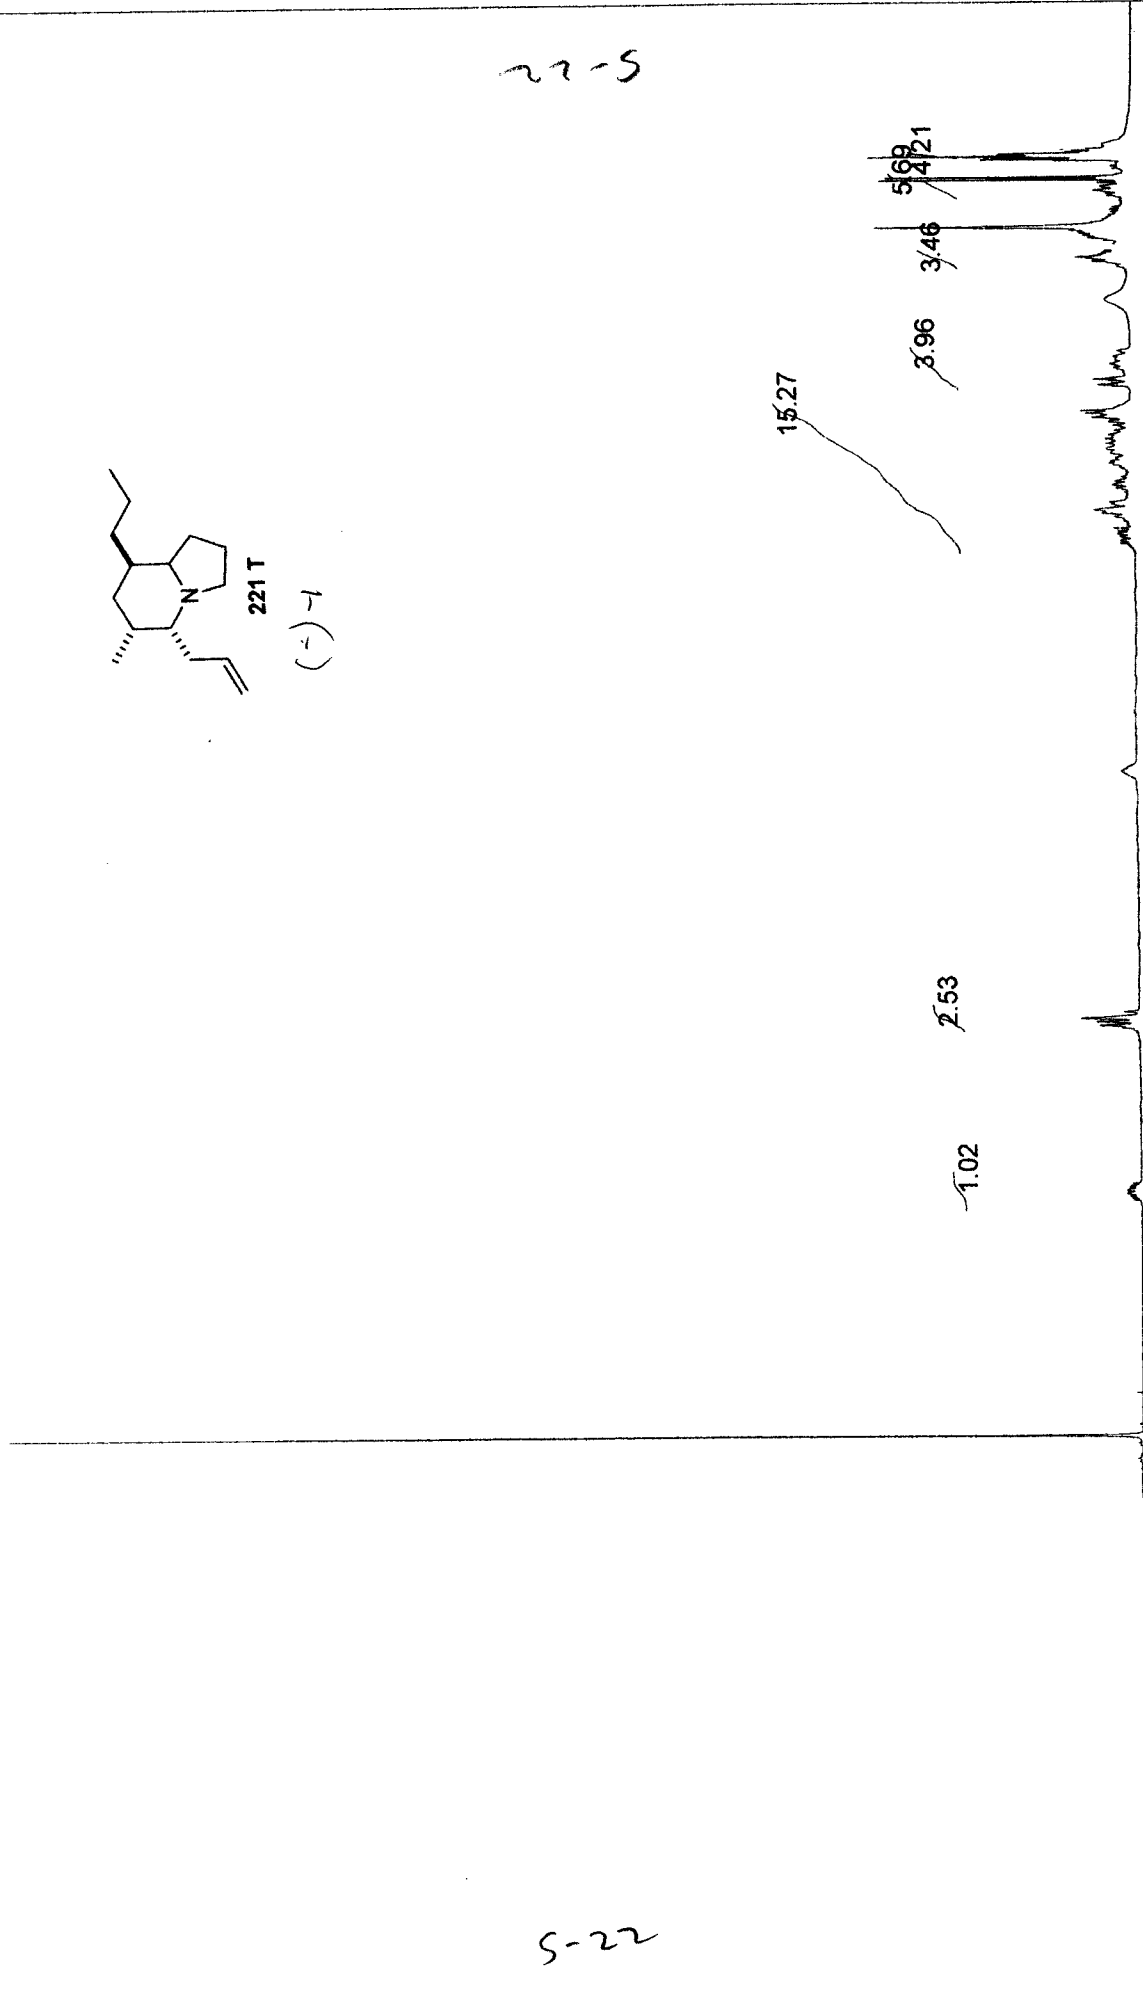

|               |   |   |   |   |   |   |   |   |   |                                               |
|---------------|---|---|---|---|---|---|---|---|---|-----------------------------------------------|
| 0             | 1 | 2 | 3 | 4 | 5 | 6 | 7 | 8 | 9 | 10                                            |
| spect. CDCl3. |   |   |   |   |   |   |   |   |   | PPM                                           |
| F1: 500.133   |   |   |   |   |   |   |   |   |   | USER: nmrsu -- DATE: Fri Jan 30 20:09:36.2009 |
| F2: 1.000     |   |   |   |   |   |   |   |   |   | PTS1d: 32768                                  |
| EX:           |   |   |   |   |   |   |   |   |   | WinNuts - \$pdata                             |
| SW1: 10331    |   |   |   |   |   |   |   |   |   | LB: 0.0                                       |
| PW: 8.3 usec  |   |   |   |   |   |   |   |   |   | NA: 32                                        |
| PD: 1.0 sec   |   |   |   |   |   |   |   |   |   |                                               |

S-22

S-23

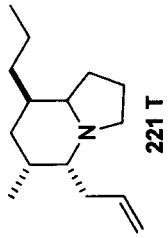

(-)-2

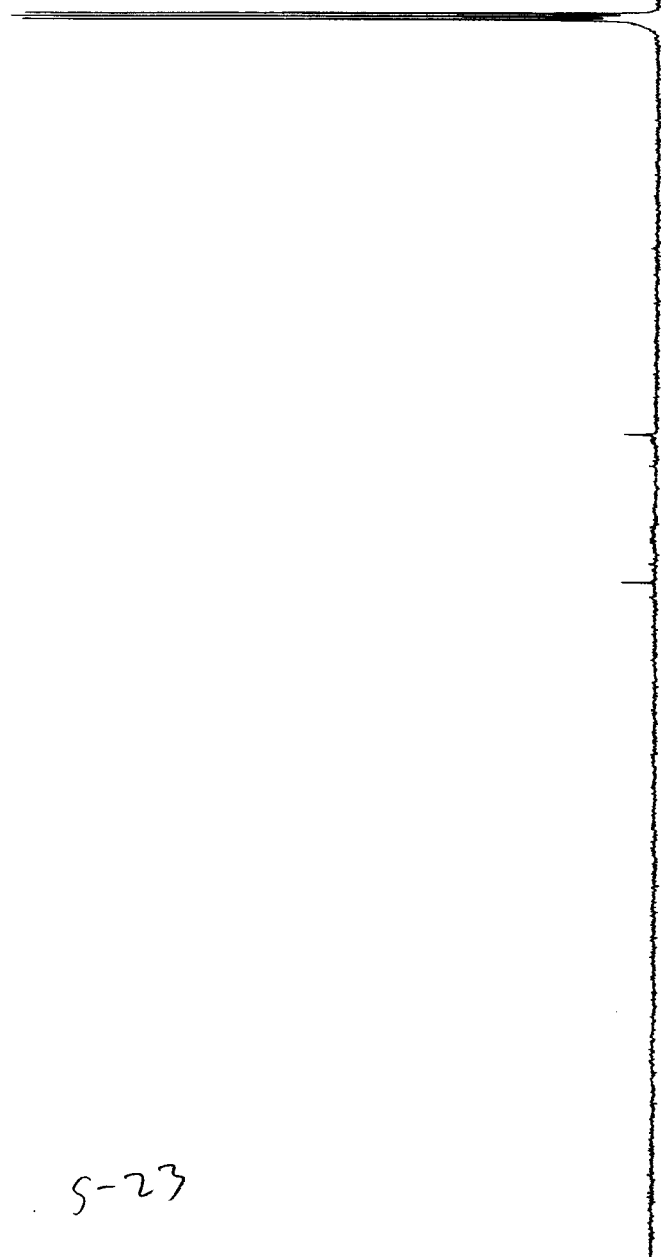

S-23

|                 |                                                             |     |
|-----------------|-------------------------------------------------------------|-----|
| carbonOVNTE.all | USER: temple -- DATE: Jan 30 08:07:33 2009 EST (UT-5h) temp | PPM |
| F1: 100.613     | OF1: 9820.4                                                 | 50  |
| F2: 1.000       | NA: 11000                                                   | 100 |
| EX:             | PD: 2.0 sec                                                 | 150 |
|                 | PW: 5.7 usec                                                |     |
|                 | LB: 3.0                                                     |     |
|                 | PTSId: 32768                                                |     |
|                 | WinNuts - \$221.T.1                                         |     |
